# Supplementary material
Source: publisher figshare collection journal article supplement (https://geolsoc.figshare.com/ndownloader/files/5422700)
Supplement: Supplementary file 1 [file 5422700]

										GARNET TRIANGULAR DIAGRAMS									USE CELLS, FORMAT, UNHIDE TO SEE COLUMNS A to I
										WARNING: Do NOT delete columns A-AE									Click on Top Left corner of Sheet first
										DATA: Enter sample information and proportions of end-members into columns labelled with 6 end member names
	(Gr+And+Sch)+Alm+Pyr					(Gr+And+Sch)+Spess+Pyr				SYMBOLS: To use different symbols copy the data from Graph Y-axes to columns AF onwards
	CALCULATIONS					CALCULATIONS			SAMPLE	SAMPLE								LEFT	TOP	RIGHT	BOTTOM		GRAPH		GRAPH		GRAPH		GRAPH		|--------		TRIANGLE DATA SYMBOLS		--------|
	Data recalculated to 100%					Data recalculated to 100%			NUMBER	NAME	Alm	Andr	Gross	Pyr	Spess	Uvar		Gr+And	Alm	Pyr	Spess		X-AXIS		Y-AXIS		X-AXIS		Y-AXIS			Circle	Circle
	TOP TRIANGLE		X			LOWER TRIANGLE		X				+Sch						+Sch					UPPER		UPPER		LOWER		LOWER
A	B	C	Value		A	D	C	Value										A	B	C	D		VALUE		VALUE		VALUE		VALUE
24.5	60.6	14.9	45.2		58.0	6.6	35.4	38.7	Blueschist	469_Pelite	59.0	0.0	23.8	14.5	2.7	0.0		24	59	15	3		65.2		151.6		58.7		-16.5			151.6	-16.5
23.5	60.8	15.8	46.2		56.3	5.9	37.8	40.8	BLUE	470_Pelite	59.3	0.0	22.9	15.4	2.4	0.0		23	59	15	2		66.2		151.9		60.8		-14.7			151.9	-14.7
29.9	53.0	17.0	43.5		62.8	1.5	35.7	36.5		471_Pelite	52.6	0.0	29.7	16.9	0.7	0.0		30	53	17	1		63.5		132.6		56.5		-3.7			132.6	-3.7
28.8	60.5	10.7	40.9		71.7	1.8	26.6	27.4		472_Pelite	60.1	0.0	28.6	10.6	0.7	0.0		29	60	11	1		60.9		151.3		47.4		-4.4			151.3	-4.4
28.0	52.3	19.8	45.9		57.5	1.9	40.7	41.6		473_Pelite	51.8	0.0	27.7	19.6	0.9	0.0		28	52	20	1		65.9		130.7		61.6		-4.7			130.7	-4.7
22.2	69.6	8.2	43.0		67.6	7.5	24.9	28.7		474_Pelite	67.9	0.0	21.7	8.0	2.4	0.0		22	68	8	2		63.0		173.9		48.7		-18.7			173.9	-18.7
20.7	70.1	9.2	44.2		64.9	6.4	28.8	31.9		475_Pelite	68.7	0.0	20.3	9.0	2.0	0.0		20	69	9	2		64.2		175.3		51.9		-16.0			175.3	-16.0
28.2	63.2	8.5	40.2		75.5	1.6	22.8	23.7		476_Pelite	62.9	0.0	28.1	8.5	0.6	0.0		28	63	9	1		60.2		158.0		43.7		-4.0			158.0	-4.0
27.1	70.1	2.8	37.8		39.0	57.0	4.0	32.5		538_Pelite	50.2	0.0	19.4	2.0	28.4	0.0		19	50	2	28		57.8		175.3		52.5		-142.6			175.3	-142.6
21.0	70.8	8.2	43.6		70.6	2.0	27.4	28.4		539_Pelite	70.3	0.0	20.9	8.1	0.6	0.0		21	70	8	1		63.6		177.0		48.4		-5.1			177.0	-5.1
21.3	67.9	10.8	44.8		52.4	20.9	26.7	37.2		540_Pelite	62.6	0.0	19.6	10.0	7.8	0.0		20	63	10	8		64.8		169.7		57.2		-52.1			169.7	-52.1
17.1	70.4	12.5	47.7		47.1	18.5	34.4	43.7		541_Pelite	65.9	0.0	16.0	11.7	6.3	0.1		16	66	12	6		67.7		176.0		63.7		-46.3			176.0	-46.3
23.8	70.1	6.0	41.1		43.1	46.0	10.9	33.9		542_Pelite	55.9	0.0	19.0	4.8	20.3	0.0		19	56	5	20		61.1		175.3		53.9		-115.1			175.3	-115.1
15.8	74.4	9.8	47.0		53.9	12.8	33.3	39.7		543_Pelite	71.6	0.0	15.2	9.4	3.6	0.2		15	72	9	4		67.0		186.1		59.7		-31.9			186.1	-31.9
29.3	67.2	3.5	37.1		67.4	24.4	8.1	20.4		544_Pelite	60.8	0.0	26.5	3.2	9.6	0.0		27	61	3	10		57.1		168.0		40.4		-61.1			168.0	-61.1
22.6	72.2	5.3	41.4		68.4	15.7	16.0	23.8		545_Pelite	68.5	0.0	21.4	5.0	4.9	0.2		21	69	5	5		61.4		180.5		43.8		-39.1			180.5	-39.1
32.1	65.3	2.5	35.2		63.9	31.0	5.1	20.6		546_Pelite	56.5	0.0	27.8	2.2	13.5	0.0		28	57	2	14		55.2		163.3		40.6		-77.6			163.3	-77.6
37.5	60.2	2.3	32.4		77.6	17.7	4.7	13.6		547_Pelite	55.5	0.0	34.6	2.1	7.9	0.0		35	56	2	8		52.4		150.5		33.6		-44.3			150.5	-44.3
25.9	70.3	3.8	39.0		33.8	61.2	5.0	35.6		548_Pelite	47.7	0.0	17.6	2.6	31.9	0.2		18	48	3	32		59.0		175.6		55.6		-153.1			175.6	-153.1
19.6	76.8	3.6	42.0		43.6	48.2	8.1	32.2		549_Pelite	63.1	0.0	16.1	3.0	17.8	0.0		16	63	3	18		62.0		191.9		52.2		-120.6			191.9	-120.6
22.8	68.5	8.6	42.9		71.2	1.9	27.0	27.9		852_Pelite	68.2	0.0	22.7	8.6	0.6	0.0		23	68	9	1		62.9		171.4		47.9		-4.7			171.4	-4.7
21.9	69.7	8.4	43.3		71.5	1.0	27.5	28.0		853_Pelite	69.4	0.0	21.8	8.4	0.3	0.1		22	69	8	0		63.3		174.2		48.0		-2.5			174.2	-2.5
34.6	56.7	8.7	37.1		76.9	3.6	19.5	21.3		857_Pelite	55.8	0.0	34.0	8.6	1.6	0.0		34	56	9	2		57.1		141.8		41.3		-9.0			141.8	-9.0
24.4	66.7	8.9	42.2		67.3	8.2	24.4	28.6		858_Pelite	64.8	0.0	23.7	8.6	2.9	0.0		24	65	9	3		62.2		166.8		48.6		-20.6			166.8	-20.6
24.7	69.0	6.3	40.8		75.7	5.0	19.3	21.8		860_Pelite	67.8	0.0	24.3	6.2	1.6	0.1		24	68	6	2		60.8		172.4		41.8		-12.5			172.4	-12.5
10.0	80.7	9.3	49.7		43.4	15.8	40.7	48.6		861_Pelite	77.7	0.0	9.6	9.0	3.5	0.2		10	78	9	4		69.7		201.7		68.6		-39.6			201.7	-39.6
21.3	72.9	5.8	42.3		54.6	30.5	14.9	30.2		863_Pelite	65.2	0.0	19.0	5.2	10.6	0.0		19	65	5	11		62.3		182.3		50.2		-76.1			182.3	-76.1
29.7	68.0	2.3	36.3		81.1	12.6	6.3	12.6		864_Pelite	64.7	0.0	28.3	2.2	4.4	0.4		28	65	2	4		56.3		169.9		32.6		-31.5			169.9	-31.5
29.0	69.2	1.8	36.4		87.9	6.5	5.6	8.9		865_Pelite	67.6	0.0	28.3	1.8	2.1	0.2		28	68	2	2		56.4		173.0		28.9		-16.3			173.0	-16.3
23.6	70.7	5.7	41.1		40.5	49.7	9.8	34.6		866_Pelite	54.5	0.0	18.2	4.4	22.3	0.5		18	55	4	22		61.1		176.7		54.6		-124.2			176.7	-124.2
20.8	71.9	7.4	43.3		41.5	43.7	14.7	36.6		867_Pelite	58.5	0.0	16.9	6.0	17.8	0.8		17	59	6	18		63.3		179.7		56.6		-109.3			179.7	-109.3
31.3	66.3	2.4	35.6		89.5	3.5	7.0	8.7		868_Pelite	65.1	0.0	30.7	2.4	1.2	0.6		31	65	2	1		55.6		165.7		28.7		-8.7			165.7	-8.7
30.8	65.6	3.6	36.4		88.4	1.2	10.4	11.0		869_Pelite	64.9	0.0	30.5	3.6	0.4	0.5		31	65	4	0		56.4		163.9		31.0		-2.9			163.9	-2.9
38.9	59.0	2.1	31.6		44.5	53.1	2.4	28.9		870_Pelite	40.0	0.0	26.4	1.4	31.5	0.7		26	40	1	32		51.6		147.5		48.9		-132.8			147.5	-132.8
34.9	60.6	4.6	34.9		85.3	3.5	11.2	12.9		871_Pelite	59.6	0.0	34.3	4.5	1.4	0.2		34	60	5	1		54.9		151.4		32.9		-8.7			151.4	-8.7
33.0	64.2	2.8	34.9		64.5	30.0	5.5	20.5		872_Pelite	55.2	0.0	28.4	2.4	13.2	0.8		28	55	2	13		54.9		160.5		40.5		-75.0			160.5	-75.0
29.6	67.1	3.3	36.9		83.1	7.6	9.3	13.1		873_Pelite	64.9	0.0	28.6	3.2	2.6	0.7		29	65	3	3		56.9		167.8		33.1		-18.9			167.8	-18.9
36.6	59.2	4.3	33.9		86.3	3.6	10.1	11.9		874_Pelite	58.1	0.0	35.9	4.2	1.5	0.3		36	58	4	2		53.9		147.9		31.9		-9.0			147.9	-9.0
28.7	68.0	3.4	37.3		65.8	26.5	7.7	21.0		875_Pelite	60.7	0.0	25.6	3.0	10.3	0.4		26	61	3	10		57.3		169.9		41.0		-66.2			169.9	-66.2
32.1	63.4	4.5	36.2		84.9	3.2	11.8	13.4		876_Pelite	62.4	0.0	31.6	4.4	1.2	0.4		32	62	4	1		56.2		158.5		33.4		-8.1			158.5	-8.1
37.4	59.3	3.3	33.0		68.8	25.1	6.1	18.6		915_Pelite	52.2	0.0	32.9	2.9	12.0	0.0		33	52	3	12		53.0		148.3		38.6		-62.8			148.3	-62.8
32.0	61.4	6.6	37.3		63.1	23.8	13.0	24.9		916_Pelite	54.8	0.0	28.6	5.9	10.8	0.0		29	55	6	11		57.3		153.4		44.9		-59.6			153.4	-59.6
31.9	61.4	6.7	37.4		62.7	24.1	13.2	25.3		917_Pelite	54.7	0.0	28.4	6.0	10.9	0.0		28	55	6	11		57.4		153.5		45.3		-60.2			153.5	-60.2
26.4	68.2	5.4	39.5		78.2	5.7	16.0	18.9		918_Pelite	66.9	0.0	25.9	5.3	1.9	0.0		26	67	5	2		59.5		170.5		38.9		-14.4			170.5	-14.4
17.6	72.2	10.2	46.3		62.3	1.4	36.3	37.0		919_Pelite	71.9	0.0	17.5	10.2	0.4	0.0		18	72	10	0		66.3		180.5		57.0		-3.6			180.5	-3.6
51.4	46.9	1.7	25.1		90.1	6.9	2.9	6.4		920_Pelite	45.1	0.0	49.4	1.6	3.8	0.0		49	45	2	4		45.1		117.3		26.4		-17.3			117.3	-17.3
29.8	50.4	19.8	45.0		49.6	17.5	32.9	41.6		Al DHZ-42	45.6	2.0	25.0	17.9	9.5	0.0		27	46	18	10		65.0		126.0		61.6		-43.7			126.0	-43.7
22.3	67.9	9.8	43.7		68.5	1.5	29.9	30.7		1693_Pelite	67.5	0.0	22.2	9.7	0.5	0.0		22	68	10	1		63.7		169.8		50.7		-3.9			169.8	-3.9
4.6	78.2	17.2	56.3		19.0	10.1	70.9	75.9	Amphibolite	1-MM29	76.2	0.0	4.5	16.8	2.4	0.0		5	76	17	2		76.3		195.4		95.9		-25.3			195.4	-25.3
4.8	82.6	12.6	53.9		22.7	17.2	60.1	68.7	RED	2-MM29	79.7	0.0	4.6	12.2	3.5	0.0		5	80	12	4		73.9		206.5		88.7		-43.1			206.5	-43.1
4.5	79.2	16.3	55.9		19.1	12.2	68.7	74.8		3-MM30	76.9	0.0	4.4	15.8	2.8	0.0		4	77	16	3		75.9		198.0		94.8		-30.4			198.0	-30.4
4.7	84.1	11.2	53.3		21.5	26.8	51.7	65.1		4_MM30	79.5	0.0	4.4	10.6	5.5	0.0		4	80	11	6		73.3		210.3		85.1		-67.1			210.3	-67.1
19.7	57.3	23.0	51.7		45.1	2.1	52.8	53.8		85Grtc	56.8	0.0	19.5	22.8	0.9	0.0		20	57	23	1		71.7		143.3		73.8		-5.2			143.3	-5.2
17.2	60.9	21.9	52.3		42.5	3.5	54.0	55.8		85Grtr	60.0	0.0	17.0	21.6	1.4	0.0		17	60	22	1		72.3		152.1		75.8		-8.8			152.1	-8.8
26.9	43.9	29.2	51.2		46.7	2.6	50.7	52.0		V46-1.2	43.2	0.0	26.5	28.8	1.5	0.0		27	43	29	2		71.2		109.6		72.0		-6.6			109.6	-6.6
28.0	51.3	20.7	46.3		55.0	4.4	40.6	42.8		V46-1.1	50.2	0.0	27.4	20.2	2.2	0.0		27	50	20	2		66.3		128.3		62.8		-11.0			128.3	-11.0
27.9	62.8	9.3	40.7		57.8	22.8	19.4	30.8		Al DHZ-33	56.6	1.4	23.7	8.4	9.9	0.0		25	57	8	10		60.7		157.0		50.8		-57.0			157.0	-57.0
30.9	53.5	15.6	42.4		64.9	2.3	32.8	33.9		Al DHZ-37	52.9	0.2	30.3	15.4	1.1	0.0		31	53	15	1		62.4		133.9		53.9		-5.9			133.9	-5.9
25.2	50.6	24.2	49.5		48.7	4.4	46.9	49.1		V46-10	49.5	0.0	24.6	23.7	2.2	0.0		25	50	24	2		69.5		126.5		69.1		-10.9			126.5	-10.9
19.0	71.4	9.6	45.3		43.4	34.7	21.9	39.3		6M26-1	62.0	7.6	8.9	8.3	13.2	0.0		17	62	8	13		65.3		178.4		59.3		-86.7			178.4	-86.7
19.4	73.0	7.6	44.1		45.9	36.1	18.1	36.1		6M26-2	63.4	3.7	13.1	6.6	13.2	0.0		17	63	7	13		64.1		182.6		56.1		-90.2			182.6	-90.2
19.5	72.9	7.6	44.0		44.0	39.0	17.0	36.5		6M26-3	62.1	6.5	10.2	6.5	14.8	0.0		17	62	6	15		64.0		182.3		56.5		-97.5			182.3	-97.5
29.8	61.0	9.2	39.7		65.0	15.0	20.1	27.6		Sik75	57.1	8.7	19.2	8.6	6.4	0.0		28	57	9	6		59.7		152.5		47.6		-37.5			152.5	-37.5
28.3	62.0	9.7	40.7		63.8	14.3	21.8	29.0		Sik75	58.3	6.7	19.9	9.1	6.0	0.1		27	58	9	6		60.7		155.1		49.0		-35.9			155.1	-35.9
26.9	62.8	10.3	41.7		65.1	10.1	24.9	29.9		Sik765	60.3	7.0	18.8	9.9	4.0	0.0		26	60	10	4		61.7		157.1		49.9		-25.1			157.1	-25.1
30.3	61.9	7.7	38.7		62.9	21.1	16.0	26.6		Sik77	56.2	6.9	20.6	7.0	9.2	0.1		28	56	7	9		58.7		154.8		46.6		-52.7			154.8	-52.7
30.8	61.0	8.2	38.7		62.8	20.4	16.8	27.0		Sik78	55.4	8.6	19.4	7.5	9.1	0.1		28	55	7	9		58.7		152.5		47.0		-51.1			152.5	-51.1
26.0	61.8	12.2	43.1		56.8	16.4	26.7	34.9		Zab82	57.5	2.7	21.5	11.4	7.0	0.0		24	57	11	7		63.1		154.4		54.9		-41.1			154.4	-41.1
26.0	61.8	12.2	43.1		56.8	16.4	26.7	34.9		Zab83	57.5	2.7	21.5	11.4	7.0	0.0		24	57	11	7		63.1		154.4		54.9		-41.1			154.4	-41.1
23.0	63.6	13.4	45.2		50.5	20.2	29.4	39.4		Zab83	58.2	3.1	18.0	12.3	8.4	0.0		21	58	12	8		65.2		158.9		59.4		-50.4			158.9	-50.4
25.6	62.1	12.3	43.3		55.2	18.4	26.5	35.7		Zab83	57.2	2.4	21.2	11.3	7.9	0.0		24	57	11	8		63.3		155.2		55.7		-45.9			155.2	-45.9
25.7	61.7	12.6	43.5		54.5	18.6	26.8	36.2		Zab84	56.7	3.9	19.7	11.6	8.1	0.0		24	57	12	8		63.5		154.2		56.2		-46.6			154.2	-46.6
25.7	61.4	12.9	43.6		55.3	16.9	27.8	36.2		Zab85	57.0	2.4	21.5	12.0	7.3	0.0		24	57	12	7		63.6		153.6		56.2		-42.3			153.6	-42.3
23.6	63.0	13.4	44.9		52.6	17.5	29.9	38.6		Zab85	58.4	3.1	18.8	12.4	7.3	0.1		22	58	12	7		64.9		157.5		58.6		-43.7			157.5	-43.7
14.4	67.4	18.2	51.9		35.4	19.8	44.8	54.7		CD-301G	62.3	0.4	13.0	16.9	7.5	0.0		13	62	17	7		71.9		168.4		74.7		-49.5			168.4	-49.5
21.0	65.4	13.7	46.4		50.7	16.1	33.1	41.2		BP-3A	61.3	2.5	17.2	12.8	6.3	0.0		20	61	13	6		66.4		163.4		61.2		-40.3			163.4	-40.3
18.2	66.2	15.7	48.7		46.3	13.9	39.8	46.8		CD303N	62.7	3.2	14.1	14.8	5.2	0.0		17	63	15	5		68.7		165.4		66.8		-34.7			165.4	-34.7
17.8	67.4	14.8	48.5		44.0	19.3	36.7	46.4		V1-1U	62.5	2.1	14.4	13.8	7.2	0.0		16	63	14	7		68.5		168.5		66.4		-48.2			168.5	-48.2
14.2	75.4	10.4	48.1		43.0	25.6	31.4	44.2		71-49H	69.5	0.0	13.1	9.6	7.8	0.0		13	70	10	8		68.1		188.5		64.2		-64.0			188.5	-64.0
16.6	69.1	14.2	48.8		41.5	22.9	35.6	47.0		D84-3F	63.3	7.0	8.3	13.0	8.4	0.0		15	63	13	8		68.8		172.8		67.0		-57.3			172.8	-57.3
22.2	67.4	10.4	44.1		58.0	14.9	27.1	34.6		K87-18	63.8	1.0	20.0	9.8	5.4	0.0		21	64	10	5		64.1		168.6		54.6		-37.3			168.6	-37.3
25.1	67.0	7.9	41.4		72.7	4.3	22.9	25.1		TM-650	66.1	0.8	23.9	7.8	1.5	0.0		25	66	8	1		61.4		167.6		45.1		-10.8			167.6	-10.8
19.8	72.9	7.3	43.8		69.3	5.1	25.6	28.2		N2	71.9	0.0	19.5	7.2	1.4	0.0		19	72	7	1		63.8		182.4		48.2		-12.7			182.4	-12.7
23.1	68.7	8.3	42.6		69.0	6.3	24.7	27.9		N1	67.3	0.8	21.8	8.1	2.1	0.0		23	67	8	2		62.6		171.7		47.9		-15.7			171.7	-15.7
5.4	71.3	23.3	58.9		17.4	8.2	74.4	78.5		BSL83r	69.5	0.0	5.3	22.7	2.5	0.1		5	70	23	3		78.9		178.2		98.5		-20.5			178.2	-20.5
4.8	65.5	29.7	62.5		13.2	4.5	82.3	84.5		BSL83c	64.3	0.0	4.7	29.2	1.6	0.1		5	64	29	2		82.5		163.7		104.5		-11.3			163.7	-11.3
9.6	64.6	25.8	58.1		25.8	4.7	69.6	71.9		BSL83i	63.5	0.0	9.4	25.4	1.7	0.0		9	64	25	2		78.1		161.5		91.9		-11.6			161.5	-11.6
12.3	59.2	28.5	58.1		28.6	5.2	66.2	68.8		BSL81r	57.7	0.0	12.0	27.8	2.2	0.2		12	58	28	2		78.1		147.9		88.8		-13.1			147.9	-13.1
22.2	50.5	27.3	52.6		42.7	4.7	52.6	54.9		BSL81	49.1	0.0	21.6	26.6	2.4	0.3		22	49	27	2		72.6		126.2		74.9		-11.9			126.2	-11.9
16.8	50.1	33.1	58.1		32.9	2.6	64.6	65.8		BSL81i	49.4	0.0	16.6	32.6	1.3	0.2		17	49	33	1		78.1		125.3		85.8		-6.4			125.3	-6.4
3.8	81.8	14.3	55.3		15.7	25.3	59.0	71.6		BSWT25r	77.1	0.0	3.6	13.5	5.8	0.1		4	77	14	6		75.3		204.6		91.6		-63.3			204.6	-63.3
6.6	74.2	19.2	56.3		21.8	14.5	63.7	70.9		BSWT25c	71.1	0.0	6.3	18.4	4.2	0.0		6	71	18	4		76.3		185.5		90.9		-36.3			185.5	-36.3
29.0	59.8	11.2	41.1		57.5	20.1	22.3	32.4		BSWT25i	54.3	0.0	26.3	10.2	9.2	0.0		26	54	10	9		61.1		149.5		52.4		-50.3			149.5	-50.3
3.6	71.1	25.3	60.8		10.4	16.3	73.3	81.4		BSWT4Ac	67.3	0.0	3.4	23.9	5.3	0.1		3	67	24	5		80.8		177.9		101.4		-40.6			177.9	-40.6
3.8	77.1	19.2	57.7		12.5	23.6	63.9	75.7		BSWT4Ar	71.9	0.0	3.5	17.9	6.6	0.0		4	72	18	7		77.7		192.7		95.7		-58.9			192.7	-58.9
4.0	72.7	23.3	59.7		12.2	16.7	71.1	79.4		BSWT4Ai	68.9	0.0	3.8	22.1	5.2	0.0		4	69	22	5		79.7		181.7		99.4		-41.8			181.7	-41.8
7.1	71.7	21.2	57.0		23.7	5.8	70.5	73.4		BSWT59c	70.5	0.0	7.0	20.8	1.7	0.1		7	71	21	2		77.0		179.3		93.4		-14.4			179.3	-14.4
3.9	78.6	17.5	56.8		16.2	10.7	73.1	78.4		BSWT59r	76.6	0.0	3.8	17.1	2.5	0.0		4	77	17	3		76.8		196.4		98.4		-26.7			196.4	-26.7
10.9	67.4	21.8	55.4		32.5	2.4	65.1	66.3		1124-Ic	66.9	0.0	10.8	21.6	0.8	0.0		11	67	22	1		75.4		168.4		86.3		-6.0			168.4	-6.0
11.8	65.6	22.6	55.4		33.6	2.0	64.4	65.4		1124-Ir	65.1	0.0	11.7	22.4	0.7	0.0		12	65	22	1		75.4		164.1		85.4		-5.0			164.1	-5.0
20.2	69.3	10.4	45.1		63.5	3.8	32.7	34.6		1124-IIc	68.5	0.0	20.0	10.3	1.2	0.0		20	69	10	1		65.1		173.3		54.6		-9.5			173.3	-9.5
5.4	73.8	20.7	57.6		20.2	2.6	77.2	78.5		1124-IIr1	73.4	0.0	5.4	20.6	0.7	0.0		5	73	21	1		77.6		184.6		98.5		-6.6			184.6	-6.6
12.3	69.7	18.0	52.8		38.5	5.1	56.4	58.9		1124-IIr2	68.7	0.0	12.1	17.7	1.6	0.0		12	69	18	2		72.8		174.4		78.9		-12.7			174.4	-12.7
22.0	73.2	4.9	41.4		54.8	33.1	12.1	28.7		1124-IIIc	64.6	0.0	19.4	4.3	11.7	0.0		19	65	4	12		61.4		182.9		48.7		-82.6			182.9	-82.6
11.2	72.2	16.6	52.7		36.5	9.7	53.8	58.7		1124-IIIr1	70.1	0.0	10.9	16.1	2.9	0.0		11	70	16	3		72.7		180.5		78.7		-24.2			180.5	-24.2
9.9	71.1	19.0	54.5		33.2	3.1	63.7	65.3		1124-IIIr2	70.5	0.0	9.8	18.8	0.9	0.0		10	71	19	1		74.5		177.9		85.3		-7.6			177.9	-7.6
26.4	67.0	6.5	40.0		63.3	21.1	15.6	26.2		1082c	61.6	0.0	24.3	6.0	8.1	0.0		24	62	6	8		60.0		167.6		46.2		-52.7			167.6	-52.7
9.0	79.9	11.1	51.0		34.0	24.4	41.6	53.8		1082r	75.1	0.0	8.5	10.4	6.1	0.0		9	75	10	6		71.0		199.7		73.8		-61.0			199.7	-61.0
12.5	69.0	18.5	53.0		37.3	7.3	55.4	59.0		1352-Ic	67.3	0.0	12.2	18.1	2.4	0.0		12	67	18	2		73.0		172.4		79.0		-18.3			172.4	-18.3
15.7	65.0	19.3	51.8		43.3	3.4	53.4	55.0		1352-Ir	64.2	0.0	15.5	19.1	1.2	0.0		16	64	19	1		71.8		162.4		75.0		-8.4			162.4	-8.4
18.8	75.8	5.4	43.3		50.2	35.3	14.5	32.2		1352-IIc	66.9	0.0	16.6	4.8	11.7	0.0		17	67	5	12		63.3		189.4		52.2		-88.4			189.4	-88.4
12.4	69.5	18.1	52.8		36.6	10.1	53.4	58.4		1352-IIr1	67.1	0.0	12.0	17.5	3.3	0.0		12	67	18	3		72.8		173.7		78.4		-25.2			173.7	-25.2
14.2	69.1	16.7	51.2		42.1	8.5	49.4	53.7		1352-IIr2	67.2	0.0	13.8	16.2	2.8	0.0		14	67	16	3		71.2		172.8		73.7		-21.3			172.8	-21.3
25.2	71.1	3.7	39.3		48.6	44.3	7.1	29.3		1352-IIIc	57.9	0.0	20.5	3.0	18.7	0.0		21	58	3	19		59.3		177.8		49.3		-110.8			177.8	-110.8
8.8	67.0	24.1	57.7		25.7	4.1	70.2	72.3		1352-IIIr	66.1	0.0	8.7	23.8	1.4	0.0		9	66	24	1		77.7		167.6		92.3		-10.3			167.6	-10.3
30.1	63.2	6.7	38.3		70.5	13.9	15.6	22.6		1126-Ic	59.7	0.0	28.4	6.3	5.6	0.0		28	60	6	6		58.3		158.1		42.6		-34.7			158.1	-34.7
6.9	71.0	22.1	57.6		22.9	3.4	73.7	75.4		1126-Ir	70.3	0.0	6.8	21.9	1.0	0.0		7	70	22	1		77.6		177.5		95.4		-8.4			177.5	-8.4
12.3	75.2	12.5	50.1		48.0	3.1	48.8	50.4		1052	74.6	0.0	12.2	12.4	0.8	0.0		12	75	12	1		70.1		188.0		70.4		-7.9			188.0	-7.9
10.1	58.9	31.0	60.4		24.0	2.6	73.4	74.7		R206-1-1	58.2	0.0	10.0	30.6	1.1	0.0		10	58	31	1		80.4		147.3		94.7		-6.6			147.3	-6.6
9.8	58.8	31.3	60.8		23.2	2.6	74.2	75.5		R206-1-2	58.2	0.0	9.7	31.0	1.1	0.0		10	58	31	1		80.8		147.1		95.5		-6.6			147.1	-6.6
9.0	70.7	20.2	55.6		28.3	8.4	63.3	67.5		R206-1-3	68.9	0.0	8.8	19.7	2.6	0.0		9	69	20	3		75.6		176.8		87.5		-20.9			176.8	-20.9
1.9	86.6	11.6	54.9		6.3	54.0	39.7	66.7		80_Pelite	74.8	0.0	1.6	10.0	13.6	0.0		2	75	10	14		74.9		216.4		86.7		-134.9			216.4	-134.9
3.0	92.0	5.0	51.0		4.5	88.3	7.3	51.4		D103C	57.5	0.0	1.9	3.1	37.6	0.0		2	58	3	38		71.0		230.0		71.4		-220.7			230.0	-220.7
3.1	93.0	3.8	50.3		3.9	91.4	4.7	50.4		D103R	53.3	0.0	1.8	2.2	42.7	0.0		2	53	2	43		70.3		232.5		70.4		-228.6			232.5	-228.6
5.8	85.9	8.3	51.3		23.2	43.3	33.5	55.1		F41C	77.6	0.0	5.2	7.5	9.7	0.0		5	78	8	10		71.3		214.8		75.1		-108.3			214.8	-108.3
5.6	87.7	6.7	50.6		22.8	49.8	27.4	52.3		F41R	78.1	0.0	5.0	6.0	10.9	0.0		5	78	6	11		70.6		219.1		72.3		-124.4			219.1	-124.4
6.5	84.2	9.4	51.4		9.7	76.2	14.0	52.1		D627C	55.8	0.0	4.3	6.2	33.7	0.0		4	56	6	34		71.4		210.4		72.1		-190.6			210.4	-190.6
5.8	81.6	12.6	53.4		9.1	71.4	19.5	55.2		D627R1	55.9	0.0	4.0	8.6	31.5	0.0		4	56	9	32		73.4		204.0		75.2		-178.6			204.0	-178.6
6.4	82.9	10.7	52.1		8.7	77.0	14.4	52.9		D627R2	52.7	0.0	4.1	6.8	36.4	0.0		4	53	7	36		72.1		207.2		72.9		-192.4			207.2	-192.4
37.3	60.1	2.6	32.7		47.2	49.5	3.3	28.1		Gt-1c	43.2	0.0	26.8	1.9	28.1	0.0		27	43	2	28		52.7		150.2		48.1		-123.7			150.2	-123.7
32.2	64.7	3.2	35.5		66.9	26.5	6.6	19.8		Gt-1r	57.3	0.0	28.5	2.8	11.3	0.0		29	57	3	11		55.5		161.7		39.8		-66.3			161.7	-66.3
31.3	64.7	4.0	36.3		43.1	51.4	5.5	31.2		Gt-2c	47.1	0.0	22.8	2.9	27.2	0.0		23	47	3	27		56.3		161.7		51.2		-128.5			161.7	-128.5
27.8	67.5	4.7	38.4		63.5	25.9	10.7	23.6		Gt-2r	60.6	0.0	25.0	4.2	10.2	0.0		25	61	4	10		58.4		168.7		43.6		-64.7			168.7	-64.7
33.6	62.6	3.8	35.1		45.9	48.9	5.2	29.7		Gt-3c	45.8	0.0	24.6	2.8	26.2	0.7		25	46	3	26		55.1		156.4		49.7		-122.2			156.4	-122.2
30.9	64.2	4.9	37.0		69.7	19.3	11.0	20.7		Gt-3r	59.1	0.0	28.5	4.5	7.9	0.0		29	59	5	8		57.0		160.4		40.7		-48.3			160.4	-48.3
28.4	67.1	4.5	38.0		52.7	39.0	8.3	27.8		Gt-4c	55.5	0.0	23.5	3.7	17.4	0.0		24	56	4	17		58.0		167.8		47.8		-97.5			167.8	-97.5
28.9	66.0	5.1	38.1		76.8	9.7	13.5	18.4		Gt-4r	63.6	0.0	27.8	4.9	3.5	0.2		28	64	5	4		58.1		165.1		38.4		-24.2			165.1	-24.2
30.0	66.2	3.7	36.8		63.7	28.4	7.9	22.1		Gt-5c	58.4	0.0	26.5	3.3	11.8	0.0		27	58	3	12		56.8		165.5		42.1		-70.9			165.5	-70.9
27.4	66.9	5.6	39.1		70.4	15.2	14.4	22.0		Gt-5r	63.2	0.0	25.9	5.3	5.6	0.0		26	63	5	6		59.1		167.4		42.0		-38.0			167.4	-38.0
29.2	67.6	3.2	37.0		45.3	49.8	4.9	29.8		Gt-6c	51.2	0.0	22.1	2.4	24.3	0.0		22	51	2	24		57.0		169.1		49.8		-124.5			169.1	-124.5
23.6	69.5	6.8	41.6		76.3	1.6	22.1	22.9		Gt-6r	69.2	0.0	23.5	6.8	0.5	0.0		24	69	7	1		61.6		173.9		42.9		-4.1			173.9	-4.1
30.9	65.5	3.6	36.3		78.2	12.8	9.0	15.4		Gt-7c	62.4	0.0	29.4	3.4	4.8	0.0		29	62	3	5		56.3		163.9		35.4		-31.9			163.9	-31.9
17.7	74.9	7.4	44.9		66.4	5.7	27.9	30.7		Gt-7r	73.8	0.0	17.4	7.3	1.5	0.0		17	74	7	2		64.9		187.3		50.7		-14.3			187.3	-14.3
32.5	62.7	4.7	36.1		72.6	16.8	10.6	19.0		Gt-8c	58.2	0.0	30.2	4.4	7.0	0.2		30	58	4	7		56.1		156.8		39.0		-42.1			156.8	-42.1
24.2	68.4	7.4	41.6		71.0	7.3	21.8	25.4		Gt-8r	66.4	0.0	23.5	7.2	2.4	0.4		24	66	7	2		61.6		171.0		45.4		-18.1			171.0	-18.1
6.2	83.7	10.1	52.0		35.1	7.5	57.5	61.2		Gt-9c	82.7	0.0	6.1	10.0	1.3	0.0		6	83	10	1		72.0		209.3		81.2		-18.7			209.3	-18.7
5.6	83.2	11.2	52.8		30.9	6.7	62.4	65.7		Gt-9r	82.2	0.0	5.5	11.1	1.2	0.0		6	82	11	1		72.8		208.0		85.7		-16.9			208.0	-16.9
7.8	80.4	11.8	52.0		27.1	31.7	41.2	57.1		Gt10c	73.4	0.0	7.1	10.8	8.3	0.4		7	73	11	8		72.0		201.0		77.1		-79.2			201.0	-79.2
2.8	82.2	15.0	56.1		14.9	6.4	78.7	81.9		Gt10r	81.3	0.0	2.8	14.8	1.2	0.0		3	81	15	1		76.1		205.5		101.9		-16.0			205.5	-16.0
7.9	77.5	14.6	53.4		24.9	28.7	46.4	60.7		Gt-11c	71.1	0.0	7.2	13.4	8.3	0.0		7	71	13	8		73.4		193.8		80.7		-71.8			193.8	-71.8
7.8	78.9	13.3	52.8		26.7	27.8	45.6	59.4		Gt-11r	72.9	0.0	7.2	12.3	7.5	0.0		7	73	12	8		72.8		197.2		79.4		-69.4			197.2	-69.4
7.0	78.7	14.2	53.6		21.4	35.6	43.1	60.8		Gt-12c	70.4	0.0	6.3	12.7	10.5	0.0		6	70	13	11		73.6		196.9		80.8		-89.0			196.9	-89.0
6.8	78.4	14.8	54.0		20.7	34.0	45.2	62.2		Gt-12r	70.6	0.0	6.1	13.3	10.0	0.0		6	71	13	10		74.0		196.1		82.2		-85.0			196.1	-85.0
3.7	77.1	19.2	57.7		8.7	46.3	44.9	68.1		Gt-13c	64.4	0.0	3.1	16.0	16.5	0.0		3	64	16	17		77.7		192.8		88.1		-115.9			192.8	-115.9
4.1	76.9	18.9	57.4		10.0	44.4	45.6	67.8		Gt-13r	65.0	0.0	3.5	16.0	15.6	0.0		4	65	16	16		77.4		192.3		87.8		-111.1			192.3	-111.1
4.4	80.8	14.8	55.2		8.5	62.8	28.7	60.1		Gt-14c	61.0	0.0	3.3	11.2	24.5	0.0		3	61	11	25		75.2		202.0		80.1		-157.1			202.0	-157.1
4.7	82.7	12.6	54.0		8.4	69.0	22.6	57.1		Gt-14r	59.6	0.0	3.4	9.1	27.8	0.0		3	60	9	28		74.0		206.7		77.1		-172.5			206.7	-172.5
4.9	79.3	15.8	55.4		19.3	18.5	62.1	71.4		186_Pelite	75.7	0.0	4.7	15.1	4.5	0.0		5	76	15	5		75.4		198.2		91.4		-46.3			198.2	-46.3
5.2	85.4	9.3	52.1		22.4	37.4	40.2	58.9		187_Pelite	78.6	0.0	4.8	8.6	8.0	0.0		5	79	9	8		72.1		213.6		78.9		-93.5			213.6	-93.5
1.8	82.5	15.6	56.9		9.4	10.9	79.7	85.2		188_Pelite	80.7	0.0	1.8	15.3	2.1	0.0		2	81	15	2		76.9		206.3		105.2		-27.3			206.3	-27.3
4.1	85.2	10.7	53.3		18.4	33.3	48.3	65.0		189_Pelite	79.3	0.0	3.8	10.0	6.9	0.0		4	79	10	7		73.3		212.9		85.0		-83.3			212.9	-83.3
3.6	80.4	16.0	56.2		16.3	11.2	72.6	78.1		190_Pelite	78.5	0.0	3.5	15.6	2.4	0.0		4	79	16	2		76.2		201.1		98.1		-27.9			201.1	-27.9
3.8	85.5	10.7	53.5		17.3	33.2	49.5	66.1		191_Pelite	79.8	0.0	3.5	10.0	6.7	0.0		4	80	10	7		73.5		213.8		86.1		-82.9			213.8	-82.9
5.4	80.9	13.7	54.1		25.5	10.1	64.4	69.5		192_Pelite	79.1	0.0	5.3	13.4	2.1	0.0		5	79	13	2		74.1		202.2		89.5		-25.2			202.2	-25.2
6.4	82.6	11.0	52.3		28.9	21.3	49.8	60.4		193_Pelite	78.8	0.0	6.1	10.5	4.5	0.0		6	79	11	5		72.3		206.5		80.4		-53.3			206.5	-53.3
3.3	81.4	15.3	56.0		15.0	15.5	69.5	77.2		194_Pelite	78.8	0.0	3.2	14.8	3.3	0.0		3	79	15	3		76.0		203.5		97.2		-38.7			203.5	-38.7
4.6	85.3	10.1	52.8		17.5	43.6	38.9	60.7		195_Pelite	76.5	0.0	4.1	9.1	10.2	0.0		4	77	9	10		72.8		213.2		80.7		-109.0			213.2	-109.0
1.4	80.0	18.6	58.6		6.8	2.9	90.2	91.7		LT122	79.6	0.0	1.4	18.5	0.6	0.0		1	80	19	1		78.6		200.0		111.7		-7.3			200.0	-7.3
1.8	81.8	16.4	57.3		9.4	5.8	84.8	87.7		PR54	80.9	0.0	1.8	16.2	1.1	0.0		2	81	16	1		77.3		204.5		107.7		-14.4			204.5	-14.4
2.4	83.2	14.4	56.0		13.7	4.6	81.7	84.0		PR40	82.5	0.0	2.4	14.3	0.8	0.0		2	83	14	1		76.0		207.9		104.0		-11.4			207.9	-11.4
1.5	84.3	14.2	56.3		9.2	4.3	86.5	88.7		PR6	83.8	0.0	1.5	14.1	0.7	0.0		2	84	14	1		76.3		210.8		108.7		-10.7			210.8	-10.7
2.0	79.3	18.6	58.3		9.2	6.0	84.8	87.8		PR42	78.3	0.0	2.0	18.4	1.3	0.0		2	78	18	1		78.3		198.3		107.8		-15.0			198.3	-15.0
9.7	76.8	13.5	51.9		39.3	6.1	54.5	57.6		PR33	75.6	0.0	9.6	13.3	1.5	0.0		10	76	13	2		71.9		191.9		77.6		-15.4			191.9	-15.4
12.5	70.7	16.9	52.2		39.5	7.1	53.4	57.0		SW163	69.1	0.0	12.2	16.5	2.2	0.0		12	69	17	2		72.2		176.6		77.0		-17.8			176.6	-17.8
12.2	70.8	17.0	52.4		40.3	3.7	56.0	57.8		SW198	70.0	0.0	12.1	16.8	1.1	0.0		12	70	17	1		72.4		176.9		77.8		-9.2			176.9	-9.2
14.1	74.2	11.6	48.7		54.2	1.2	44.6	45.2		LT115	74.1	0.0	14.1	11.6	0.3	0.0		14	74	12	0		68.7		185.6		65.2		-2.9			185.6	-2.9
14.7	68.8	16.5	50.9		44.4	5.6	50.0	52.8		TI72	67.5	0.0	14.4	16.2	1.8	0.0		14	68	16	2		70.9		172.0		72.8		-13.9			172.0	-13.9
20.0	67.0	13.0	46.5		57.0	6.1	36.9	40.0		O1	65.6	0.0	19.6	12.7	2.1	0.0		20	66	13	2		66.5		167.5		60.0		-15.3			167.5	-15.3
18.8	66.3	14.9	48.1		54.4	2.3	43.3	44.4		PF3	65.8	0.0	18.6	14.8	0.8	0.0		19	66	15	1		68.1		165.8		64.4		-5.8			165.8	-5.8
21.0	67.0	12.0	45.5		60.7	4.7	34.6	37.0		SW158	65.9	0.0	20.7	11.8	1.6	0.0		21	66	12	2		65.5		167.4		57.0		-11.7			167.4	-11.7
26.0	65.5	8.4	41.2		72.1	4.5	23.4	25.6		SW151	64.5	0.0	25.6	8.3	1.6	0.0		26	65	8	2		61.2		163.9		45.6		-11.3			163.9	-11.3
12.3	77.0	10.7	49.2		49.6	7.4	43.0	46.7		263_Pelite	75.5	0.0	12.1	10.5	1.8	0.0		12	76	11	2		69.2		192.4		66.7		-18.4			192.4	-18.4
8.9	83.8	7.4	49.2		34.2	37.6	28.3	47.0		264_Pelite	76.3	0.0	8.1	6.7	8.9	0.0		8	76	7	9		69.2		209.4		67.0		-93.9			209.4	-93.9
17.5	73.7	8.8	45.6		59.9	10.2	29.9	35.0		265_Pelite	71.6	0.0	17.0	8.5	2.9	0.0		17	72	9	3		65.6		184.3		55.0		-25.5			184.3	-25.5
19.4	73.4	7.3	43.9		55.6	23.6	20.8	32.6		266_Pelite	67.8	0.0	17.9	6.7	7.6	0.0		18	68	7	8		63.9		183.4		52.6		-59.0			183.4	-59.0
6.5	70.5	23.0	58.3		21.3	3.0	75.7	77.2		G-60	69.8	2.5	3.9	22.8	0.9	0.1		6	70	23	1		78.3		176.3		97.2		-7.5			176.3	-7.5
9.7	70.7	19.6	55.0		31.4	5.0	63.7	66.2		G-59	69.6	0.0	9.5	19.3	1.5	0.1		10	70	19	2		75.0		176.8		86.2		-12.4			176.8	-12.4
14.6	70.1	15.3	50.3		45.5	7.0	47.5	51.0		G-58	68.5	0.0	14.3	14.9	2.2	0.0		14	69	15	2		70.3		175.3		71.0		-17.5			175.3	-17.5
15.9	71.4	12.7	48.4		46.0	17.2	36.8	45.4		G-57	67.4	0.0	15.0	12.0	5.6	0.0		15	67	12	6		68.4		178.5		65.4		-42.9			178.5	-42.9
17.7	71.7	10.7	46.5		53.7	14.0	32.4	39.4		G-56	68.5	0.0	16.9	10.2	4.4	0.1		17	69	10	4		66.5		179.1		59.4		-34.9			179.1	-34.9
16.2	73.0	10.8	47.3		50.7	15.8	33.6	41.4		G-55	69.2	0.0	15.4	10.2	4.8	0.4		15	69	10	5		67.3		182.5		61.4		-39.5			182.5	-39.5
19.4	71.6	9.0	44.8		55.8	18.4	25.8	35.0		G-14	67.2	0.2	18.0	8.4	6.0	0.2		18	67	8	6		64.8		179.1		55.0		-46.0			179.1	-46.0
17.3	72.7	10.0	46.3		53.6	15.6	30.8	38.6		G-45	69.2	0.0	16.5	9.5	4.8	0.0		17	69	10	5		66.3		181.7		58.6		-39.0			181.7	-39.0
17.1	71.9	11.0	47.0		52.2	14.1	33.7	40.7		G-46	68.7	0.0	16.3	10.5	4.4	0.1		16	69	11	4		67.0		179.8		60.7		-35.3			179.8	-35.3
11.7	70.6	17.8	53.1		36.9	6.8	56.3	59.7		G-47	69.0	0.0	11.4	17.4	2.1	0.1		11	69	17	2		73.1		176.4		79.7		-17.0			176.4	-17.0
6.3	73.6	20.1	56.9		22.3	6.8	70.9	74.3		G-48	72.2	0.0	6.2	19.7	1.9	0.0		6	72	20	2		76.9		184.0		94.3		-17.1			184.0	-17.1
3.4	75.7	20.9	58.8		12.5	9.9	77.6	82.5		278_Pelite	73.8	0.0	3.3	20.4	2.6	0.0		3	74	20	3		78.8		189.2		102.5		-24.7			189.2	-24.7
4.2	74.6	21.1	58.5		15.0	9.5	75.5	80.2		279_Pelite	72.7	0.0	4.1	20.6	2.6	0.0		4	73	21	3		78.5		186.6		100.2		-23.8			186.6	-23.8
4.4	70.6	25.0	60.3		13.9	6.8	79.3	82.7		280_Pelite	69.1	0.0	4.3	24.5	2.1	0.0		4	69	25	2		80.3		176.5		102.7		-17.0			176.5	-17.0
4.8	71.0	24.2	59.7		15.3	7.8	76.9	80.8		281_Pelite	69.3	0.0	4.7	23.6	2.4	0.0		5	69	24	2		79.7		177.5		100.8		-19.5			177.5	-19.5
4.8	72.0	23.2	59.2		15.8	7.7	76.4	80.3		282_Pelite	70.3	0.0	4.7	22.7	2.3	0.0		5	70	23	2		79.2		179.9		100.3		-19.4			179.9	-19.4
4.5	73.4	22.1	58.8		15.5	8.8	75.7	80.1		283_Pelite	71.6	0.0	4.4	21.5	2.5	0.0		4	72	22	3		78.8		183.6		100.1		-22.0			183.6	-22.0
4.4	74.7	20.8	58.2		15.8	9.6	74.6	79.4		284_Pelite	72.8	0.0	4.3	20.3	2.6	0.0		4	73	20	3		78.2		186.9		99.4		-23.9			186.9	-23.9
4.6	73.2	22.2	58.8		15.7	9.1	75.3	79.8		285_Pelite	71.3	0.0	4.5	21.6	2.6	0.0		5	71	22	3		78.8		183.0		99.8		-22.6			183.0	-22.6
4.5	72.8	22.6	59.1		15.2	8.3	76.5	80.6		286_Pelite	71.1	0.0	4.4	22.1	2.4	0.0		4	71	22	2		79.1		182.1		100.6		-20.8			182.1	-20.8
3.9	77.4	18.8	57.4		14.1	17.9	68.1	77.0		287_Pelite	73.8	0.0	3.7	17.9	4.7	0.0		4	74	18	5		77.4		193.4		97.0		-44.7			193.4	-44.7
3.7	76.0	20.4	58.3		12.7	17.0	70.3	78.8		288_Pelite	72.4	0.0	3.5	19.4	4.7	0.0		4	72	19	5		78.3		189.9		98.8		-42.6			189.9	-42.6
3.7	75.9	20.4	58.4		12.6	17.6	69.8	78.6		289_Pelite	72.2	0.0	3.5	19.4	4.9	0.0		4	72	19	5		78.4		189.8		98.6		-44.1			189.8	-44.1
3.6	76.1	20.2	58.3		12.9	15.5	71.6	79.3		290_Pelite	73.0	0.0	3.5	19.4	4.2	0.0		4	73	19	4		78.3		190.3		99.3		-38.7			190.3	-38.7
3.8	77.2	19.1	57.6		13.7	17.1	69.2	77.8		291_Pelite	73.7	0.0	3.6	18.2	4.5	0.0		4	74	18	5		77.6		192.9		97.8		-42.8			192.9	-42.8
3.3	77.2	19.5	58.1		12.2	17.1	70.7	79.3		292_Pelite	73.8	0.0	3.2	18.6	4.5	0.0		3	74	19	5		78.1		193.0		99.3		-42.8			193.0	-42.8
3.6	74.2	22.3	59.4		11.7	15.1	73.2	80.8		293_Pelite	70.9	0.0	3.4	21.3	4.4	0.0		3	71	21	4		79.4		185.4		100.8		-37.8			185.4	-37.8
4.3	73.6	22.1	58.9		13.9	14.2	71.9	79.0		294_Pelite	70.5	0.0	4.1	21.2	4.2	0.0		4	71	21	4		78.9		184.0		99.0		-35.6			184.0	-35.6
3.9	74.9	21.2	58.7		13.0	15.5	71.5	79.2		295_Pelite	71.6	0.0	3.7	20.3	4.4	0.0		4	72	20	4		78.7		187.2		99.2		-38.7			187.2	-38.7
4.3	80.7	15.0	55.3		17.1	24.2	58.8	70.8		S-28r	76.1	0.0	4.1	14.1	5.8	0.0		4	76	14	6		75.3		201.7		90.8		-60.4			201.7	-60.4
4.3	77.1	18.6	57.1		15.0	20.9	64.1	74.5		S-28c	72.7	0.0	4.1	17.5	5.7	0.0		4	73	18	6		77.1		192.7		94.5		-52.2			192.7	-52.2
6.2	82.6	11.2	52.5		20.8	41.3	37.9	58.5		WB-026r	73.6	0.0	5.5	10.0	10.9	0.0		6	74	10	11		72.5		206.5		78.5		-103.2			206.5	-103.2
6.1	80.4	13.5	53.7		20.1	35.4	44.5	62.2		WB-026c	72.6	0.0	5.5	12.2	9.7	0.0		6	73	12	10		73.7		201.0		82.2		-88.5			201.0	-88.5
12.7	76.7	10.5	48.9		46.0	15.8	38.1	46.0		SCH-009r	73.5	0.0	12.2	10.1	4.2	0.0		12	74	10	4		68.9		191.8		66.0		-39.6			191.8	-39.6
13.9	73.4	12.7	49.4		45.6	12.9	41.5	48.0		SCH-009c	70.6	0.0	13.4	12.2	3.8	0.0		13	71	12	4		69.4		183.5		68.0		-32.3			183.5	-32.3
37.2	59.3	3.5	33.1		57.0	37.7	5.3	24.2		VUW37559-e	47.6	0.0	29.9	2.8	19.8	0.0		30	48	3	20		53.1		148.2		44.2		-94.3			148.2	-94.3
28.3	66.5	5.2	38.5		57.1	32.3	10.5	26.7		VUW37559-1c	57.3	0.0	24.4	4.5	13.8	0.0		24	57	5	14		58.5		166.2		46.7		-80.8			166.2	-80.8
23.4	70.2	6.5	41.5		51.9	33.8	14.3	31.2		VUW37559-2c	60.9	0.0	20.3	5.6	13.2	0.0		20	61	6	13		61.5		175.4		51.2		-84.4			175.4	-84.4
16.7	75.7	7.6	45.4		44.8	34.8	20.3	37.7		VUW37559-2r	67.0	0.0	14.8	6.7	11.5	0.0		15	67	7	12		65.4		189.3		57.7		-87.1			189.3	-87.1
16.0	75.7	8.3	46.2		47.1	28.4	24.5	38.7		VUW37559-3c	69.0	0.0	14.6	7.6	8.8	0.0		15	69	8	9		66.2		189.1		58.7		-71.0			189.1	-71.0
12.3	77.2	10.5	49.1		46.5	14.1	39.5	46.5		VUW37559-3r	74.4	0.0	11.9	10.1	3.6	0.0		12	74	10	4		69.1		192.9		66.5		-35.2			192.9	-35.2
8.5	79.4	12.1	51.8		39.3	4.7	56.1	58.4		VUW37559-4	78.6	0.0	8.4	12.0	1.0	0.0		8	79	12	1		71.8		198.5		78.4		-11.7			198.5	-11.7
20.1	70.9	9.0	44.4		67.6	2.4	30.1	31.3		VUW37559-5	70.4	0.0	20.0	8.9	0.7	0.0		20	70	9	1		64.4		177.2		51.3		-5.9			177.2	-5.9
5.2	71.1	23.8	59.3		13.4	25.0	61.6	74.1		87.128c	64.8	0.0	4.7	21.7	8.8	0.0		5	65	22	9		79.3		177.6		94.1		-62.5			177.6	-62.5
5.1	74.0	20.9	57.9		13.7	30.7	55.7	71.0		87.128r	66.3	0.0	4.6	18.7	10.3	0.0		5	66	19	10		77.9		185.0		91.0		-76.6			185.0	-76.6
19.8	72.5	7.8	44.0		45.6	36.5	17.9	36.1		391_Pelite	62.6	0.0	17.1	6.7	13.7	0.0		17	63	7	14		64.0		181.1		56.1		-91.3			181.1	-91.3
15.3	73.5	11.2	48.0		47.1	18.3	34.6	43.8		392_Pelite	69.4	0.0	14.4	10.6	5.6	0.0		14	69	11	6		68.0		183.8		63.8		-45.8			183.8	-45.8
11.9	76.0	12.2	50.2		41.1	16.7	42.2	50.5		393_Pelite	72.4	0.0	11.3	11.6	4.6	0.0		11	72	12	5		70.2		189.9		70.5		-41.8			189.9	-41.8
7.6	74.5	18.0	55.2		27.3	7.7	64.9	68.8		394_Pelite	73.0	0.3	7.1	17.6	2.1	0.0		7	73	18	2		75.2		186.2		88.8		-19.4			186.2	-19.4
6.0	69.9	24.0	59.0		19.7	1.6	78.6	79.4		395_Pelite	69.5	0.0	6.0	23.9	0.5	0.0		6	70	24	1		79.0		174.8		99.4		-4.1			174.8	-4.1
15.3	74.7	10.0	47.3		48.2	20.4	31.4	41.6		396_Pelite	70.2	3.9	10.5	9.4	6.1	0.0		14	70	9	6		67.3		186.7		61.6		-51.0			186.7	-51.0
6.2	73.4	20.3	57.0		22.9	2.6	74.5	75.8		397_Pelite	72.9	0.8	5.4	20.2	0.7	0.0		6	73	20	1		77.0		183.5		95.8		-6.5			183.5	-6.5
1.9	88.6	9.5	53.8		14.7	13.2	72.1	78.7		CH4c-o	87.0	0.0	1.9	9.3	1.7	0.0		2	87	9	2		73.8		221.5		98.7		-32.9			221.5	-32.9
21.3	75.1	3.5	41.1		25.0	70.9	4.1	39.6		CH907	46.8	0.0	13.3	2.2	37.7	0.0		13	47	2	38		61.1		187.8		59.6		-177.2			187.8	-177.2
11.4	81.4	7.2	47.9		49.8	18.7	31.5	40.9		KA9116	78.1	0.0	10.9	6.9	4.1	0.0		11	78	7	4		67.9		203.6		60.9		-46.8			203.6	-46.8
24.9	63.5	11.5	43.3		52.1	23.8	24.1	36.0		CH91117	56.8	0.0	22.3	10.3	10.2	0.4		22	57	10	10		63.3		158.8		56.0		-59.6			158.8	-59.6
3.6	82.0	14.5	55.5		15.7	20.7	63.6	74.0		KA91121	78.1	0.0	3.4	13.8	4.5	0.1		3	78	14	5		75.5		204.9		94.0		-51.8			204.9	-51.8
34.8	49.1	16.2	40.7		63.6	6.8	29.6	33.0		CH91133	47.3	0.0	33.5	15.6	3.6	0.0		34	47	16	4		60.7		122.7		53.0		-17.1			122.7	-17.1
6.3	79.0	14.7	54.2		25.5	15.5	59.0	66.7		KA91142	76.0	0.0	6.1	14.1	3.7	0.1		6	76	14	4		74.2		197.5		86.7		-38.7			197.5	-38.7
33.7	61.4	4.8	35.6		62.9	28.1	9.0	23.1		BB91155	53.4	0.0	29.3	4.2	13.1	0.1		29	53	4	13		55.6		153.6		43.1		-70.3			153.6	-70.3
1.3	88.0	10.7	54.7		9.9	9.2	80.9	85.5		BB91159	87.0	0.0	1.3	10.6	1.2	0.0		1	87	11	1		74.7		219.9		105.5		-22.9			219.9	-22.9
10.0	68.5	21.6	55.8		28.2	10.6	61.2	66.5		GH9201	66.0	0.0	9.6	20.8	3.6	0.0		10	66	21	4		75.8		171.2		86.5		-26.5			171.2	-26.5
8.8	75.1	16.1	53.6		17.4	50.7	31.8	57.2		BA9202	59.8	0.0	7.0	12.8	20.4	0.0		7	60	13	20		73.6		187.8		77.2		-126.9			187.8	-126.9
9.9	74.7	15.4	52.7		37.5	4.2	58.2	60.3		CH9203	73.9	0.0	9.8	15.2	1.1	0.0		10	74	15	1		72.7		186.8		80.3		-10.5			186.8	-10.5
9.5	73.0	17.5	54.0		27.6	21.3	51.1	61.8		CH9204	67.9	0.0	8.8	16.3	6.8	0.2		9	68	16	7		74.0		182.5		81.8		-53.3			182.5	-53.3
6.7	86.2	7.1	50.2		36.8	24.1	39.1	51.1		KA9206	82.6	0.0	6.4	6.8	4.2	0.0		6	83	7	4		70.2		215.6		71.1		-60.3			215.6	-60.3
18.0	75.7	6.3	44.2		29.2	60.5	10.3	40.5		BB9207	55.2	0.0	13.1	4.6	27.1	0.0		13	55	5	27		64.2		189.3		60.5		-151.2			189.3	-151.2
8.6	81.4	10.0	50.7		28.8	37.5	33.7	52.4		BA9211	73.3	0.0	7.7	9.0	10.0	0.0		8	73	9	10		70.7		203.6		72.4		-93.6			203.6	-93.6
9.8	66.9	23.3	56.8		16.2	45.3	38.5	61.2		BA9212	52.5	0.0	7.7	18.3	21.5	0.0		8	53	18	22		76.8		167.2		81.2		-113.2			167.2	-113.2
20.0	74.0	6.0	43.0		48.1	37.5	14.4	33.2		CH9214	64.0	0.0	17.3	5.2	13.5	0.0		17	64	5	14		63.0		185.0		53.2		-93.8			185.0	-93.8
29.5	64.9	5.6	38.1		67.7	19.4	12.9	22.6		GH9215C	59.8	0.0	27.2	5.2	7.8	0.0		27	60	5	8		58.1		162.1		42.6		-48.5			162.1	-48.5
20.3	59.4	20.2	49.9		48.1	4.1	47.8	49.9		BF9216	58.4	0.0	20.0	19.9	1.7	0.0		20	58	20	2		69.9		148.5		69.9		-10.2			148.5	-10.2
8.6	77.0	14.3	52.9		17.3	53.8	28.8	55.7		CH9217	60.7	0.0	6.8	11.3	21.1	0.0		7	61	11	21		72.9		192.6		75.7		-134.6			192.6	-134.6
1.7	82.3	16.0	57.1		9.1	5.9	84.9	87.9		WF9219	81.5	0.0	1.7	15.8	1.1	0.0		2	82	16	1		77.1		205.8		107.9		-14.8			205.8	-14.8
2.3	85.7	12.0	54.8		14.7	9.6	75.6	80.4		BB9223A	84.5	0.0	2.3	11.8	1.5	0.0		2	85	12	2		74.8		214.2		100.4		-24.0			214.2	-24.0
37.7	60.9	1.4	31.9		66.0	31.5	2.5	18.2		532_Pelite	51.6	0.0	31.9	1.2	15.2	0.0		32	52	1	15		51.9		152.3		38.2		-78.7			152.3	-78.7
36.2	62.0	1.7	32.8		67.5	29.3	3.2	17.9		533_Pelite	53.6	0.0	31.3	1.5	13.6	0.0		31	54	2	14		52.8		155.1		37.9		-73.3			155.1	-73.3
32.9	64.8	2.3	34.7		75.2	19.6	5.2	15.0		534_Pelite	59.7	0.0	30.3	2.1	7.9	0.0		30	60	2	8		54.7		162.1		35.0		-49.0			162.1	-49.0
33.8	63.6	2.6	34.4		82.0	11.7	6.3	12.2		535_Pelite	60.7	0.0	32.3	2.5	4.6	0.0		32	61	3	5		54.4		158.9		32.2		-29.2			158.9	-29.2
41.1	56.9	2.0	30.5		91.2	4.3	4.5	6.7		536_Pelite	55.8	0.0	40.3	2.0	1.9	0.0		40	56	2	2		50.5		142.2		26.7		-10.7			142.2	-10.7
33.5	62.8	3.6	35.0		88.6	1.9	9.6	10.5		537_Pelite	62.4	0.0	33.3	3.6	0.7	0.0		33	62	4	1		55.0		157.1		30.5		-4.7			157.1	-4.7
25.7	70.5	3.8	39.1		18.1	79.2	2.7	42.3		P221c	33.2	0.0	12.1	1.8	52.9	0.0		12	33	2	53		59.1		176.2		62.3		-198.0			176.2	-198.0
28.7	68.3	3.0	37.1		19.9	78.1	2.1	41.1		P221cr	32.1	2.2	11.3	1.4	53.1	0.0		14	32	1	53		57.1		170.7		61.1		-195.2			170.7	-195.2
17.7	70.8	11.5	46.9		32.9	45.7	21.3	44.2		P221r	56.8	0.0	14.2	9.2	19.7	0.0		14	57	9	20		66.9		177.1		64.2		-114.3			177.1	-114.3
21.6	71.4	7.0	42.7		26.1	65.5	8.4	41.2		B178cr	46.2	0.0	14.0	4.5	35.2	0.0		14	46	5	35		62.7		178.5		61.2		-163.9			178.5	-163.9
16.9	72.6	10.5	46.8		38.6	37.5	23.9	42.7		B178r	62.4	0.0	14.5	9.0	14.1	0.0		15	62	9	14		66.8		181.6		62.7		-93.8			181.6	-93.8
18.5	72.6	8.9	45.2		23.4	65.3	11.3	44.0		B125c	47.9	0.0	12.2	5.9	34.1	0.0		12	48	6	34		65.2		181.4		64.0		-163.3			181.4	-163.3
20.2	72.2	7.6	43.7		26.1	64.0	9.9	41.9		B125cr	48.3	0.5	13.0	5.1	33.1	0.0		14	48	5	33		63.7		180.5		61.9		-160.1			180.5	-160.1
18.2	68.4	13.4	47.6		29.9	48.0	22.1	46.1		B125r	53.0	0.0	14.1	10.4	22.6	0.0		14	53	10	23		67.6		171.0		66.1		-120.0			171.0	-120.0
21.9	73.6	4.5	41.3		18.0	78.3	3.7	42.9		B339c	37.7	0.0	11.2	2.3	48.8	0.0		11	38	2	49		61.3		184.1		62.9		-195.8			184.1	-195.8
26.2	70.6	3.3	38.6		21.5	75.8	2.7	40.6		B339cr	36.7	0.0	13.6	1.7	47.9	0.0		14	37	2	48		58.6		176.4		60.6		-189.5			176.4	-189.5
20.7	67.0	12.3	45.8		36.8	41.4	21.9	42.6		B339r	54.4	0.0	16.8	10.0	18.9	0.0		17	54	10	19		65.8		167.5		62.6		-103.4			167.5	-103.4
21.3	73.8	4.8	41.8		20.3	75.1	4.6	42.2		B338c	41.2	0.0	11.9	2.7	44.1	0.0		12	41	3	44		61.8		184.6		62.2		-187.8			184.6	-187.8
24.7	70.7	4.5	39.9		23.9	71.7	4.4	40.2		B338cr	40.6	1.3	12.9	2.6	42.6	0.0		14	41	3	43		59.9		176.8		60.2		-179.3			176.8	-179.3
17.5	70.6	12.0	47.3		32.3	45.6	22.1	44.9		B338r	56.6	0.0	14.0	9.6	19.8	0.0		14	57	10	20		67.3		176.4		64.9		-114.1			176.4	-114.1
21.0	72.0	7.0	43.0		18.7	75.0	6.2	43.8		B42c	39.0	0.0	11.4	3.8	45.7	0.0		11	39	4	46		63.0		179.9		63.8		-187.6			179.9	-187.6
18.2	69.9	11.9	46.9		29.0	52.0	19.0	45.0		B42r	52.7	0.0	13.7	9.0	24.6	0.0		14	53	9	25		66.9		174.7		65.0		-130.0			174.7	-130.0
17.9	73.8	8.3	45.2		22.3	67.4	10.4	44.0		B39c	47.9	0.0	11.6	5.4	35.1	0.0		12	48	5	35		65.2		184.5		64.0		-168.4			184.5	-168.4
16.6	75.2	8.2	45.8		21.5	67.9	10.7	44.6		B39r	49.3	0.0	10.9	5.4	34.4	0.0		11	49	5	34		65.8		187.9		64.6		-169.6			187.9	-169.6
21.1	75.0	3.9	41.4		75.6	10.3	14.0	19.2		UH2A-F1	72.9	0.0	20.5	3.8	2.8	0.0		21	73	4	3		61.4		187.5		39.2		-25.8			187.5	-25.8
25.4	70.2	4.4	39.5		75.9	11.1	13.0	18.6		UH2A-F0	67.7	0.0	24.5	4.2	3.6	0.0		25	68	4	4		59.5		175.6		38.6		-27.9			175.6	-27.9
15.0	80.8	4.2	44.6		59.0	24.3	16.7	28.9		UH2B-F0	76.1	0.0	14.1	4.0	5.8	0.0		14	76	4	6		64.6		202.0		48.9		-60.7			202.0	-60.7
13.4	81.8	4.8	45.7		50.6	31.4	18.0	33.7		UH2B-F2	75.6	0.0	12.4	4.4	7.7	0.0		12	76	4	8		65.7		204.5		53.7		-78.6			204.5	-78.6
21.6	74.5	3.9	41.1		79.5	6.3	14.2	17.4		UH1	73.3	0.0	21.3	3.8	1.7	0.0		21	73	4	2		61.1		186.2		37.4		-15.9			186.2	-15.9
1.2	86.0	12.9	55.9		5.7	31.3	63.0	78.6		LH1A	80.8	0.0	1.1	12.1	6.0	0.0		1	81	12	6		75.9		214.9		98.6		-78.1			214.9	-78.1
1.7	87.2	11.1	54.7		8.4	37.4	54.2	72.9		LH1B	81.1	0.0	1.6	10.3	7.1	0.0		2	81	10	7		74.7		218.0		92.9		-93.4			218.0	-93.4
4.9	85.0	10.2	52.6		21.1	34.7	44.1	61.5		16-1	78.6	0.0	4.5	9.4	7.4	0.0		5	79	9	7		72.6		212.4		81.5		-86.9			212.4	-86.9
4.5	85.3	10.1	52.8		14.6	53.0	32.5	59.0		16-4	73.2	0.0	3.9	8.7	14.2	0.0		4	73	9	14		72.8		213.3		79.0		-132.5			213.3	-132.5
6.7	78.5	14.9	54.1		22.9	26.2	50.9	64.0		CC273	72.9	0.0	6.2	13.8	7.1	0.0		6	73	14	7		74.1		196.2		84.0		-65.5			196.2	-65.5
27.0	61.1	11.9	42.5		64.9	6.4	28.6	31.9		5-1	59.5	0.0	26.3	11.6	2.6	0.0		26	60	12	3		62.5		152.7		51.9		-16.0			152.7	-16.0
32.2	58.1	9.7	38.8		66.5	13.4	20.0	26.8		17-6	54.5	0.0	30.2	9.1	6.1	0.0		30	55	9	6		58.8		145.3		46.8		-33.6			145.3	-33.6
11.3	83.2	5.5	47.1		18.4	72.6	9.0	45.3		Gr64c	57.6	0.0	7.8	3.8	30.8	0.0		8	58	4	31		67.1		208.1		65.3		-181.6			208.1	-181.6
10.2	83.4	6.3	48.0		32.4	47.6	20.0	43.8		Gr64r	72.5	0.0	8.9	5.5	13.1	0.0		9	73	6	13		68.0		208.6		63.8		-119.1			208.6	-119.1
12.2	79.5	8.4	48.1		47.7	19.3	32.9	42.6		GR93	75.8	0.0	11.6	8.0	4.7	0.0		12	76	8	5		68.1		198.6		62.6		-48.4			198.6	-48.4
11.6	82.5	5.9	47.1		57.1	14.1	28.8	35.9		GR99	80.3	0.0	11.3	5.7	2.8	0.0		11	80	6	3		67.1		206.3		55.9		-35.4			206.3	-35.4
11.9	71.2	17.0	52.5		32.4	21.5	46.2	56.9		GR31.1	65.9	0.0	11.0	15.7	7.3	0.0		11	66	16	7		72.5		177.9		76.9		-53.7			177.9	-53.7
11.0	73.4	15.6	52.3		31.8	23.4	44.9	56.5		GR31.1	68.0	0.0	10.2	14.4	7.5	0.0		10	68	14	8		72.3		183.6		76.5		-58.4			183.6	-58.4
13.5	71.9	14.7	50.6		36.7	23.4	39.9	51.6		GR31.1	66.2	0.0	12.4	13.5	7.9	0.0		12	66	14	8		70.6		179.7		71.6		-58.4			179.7	-58.4
9.3	76.7	13.9	52.3		29.3	27.2	43.5	57.1		GR31.1	70.6	0.0	8.6	12.8	8.0	0.0		9	71	13	8		72.3		191.8		77.1		-68.0			191.8	-68.0
9.9	76.5	13.7	51.9		31.0	26.2	42.9	56.0		GR31.1	70.6	0.0	9.1	12.6	7.7	0.0		9	71	13	8		71.9		191.2		76.0		-65.5			191.2	-65.5
7.7	79.0	13.3	52.8		32.5	11.3	56.3	61.9		M138/1Grt410c	77.0	0.0	7.5	13.0	2.6	0.0		8	77	13	3		72.8		197.4		81.9		-28.1			197.4	-28.1
14.8	73.2	12.1	48.7		50.3	8.4	41.3	45.5		M138/1Grt421r	71.4	0.0	14.4	11.8	2.4	0.0		14	71	12	2		68.7		182.9		65.5		-21.0			182.9	-21.0
11.2	77.5	11.2	50.0		44.0	12.1	44.0	50.0		M138/1Grt214r	75.3	0.0	10.9	10.9	3.0	0.0		11	75	11	3		70.0		193.9		70.0		-30.2			193.9	-30.2
8.9	78.4	12.8	52.0		35.8	12.5	51.7	57.9		M138/1Grt220r	76.0	0.0	8.6	12.4	3.0	0.0		9	76	12	3		72.0		195.9		77.9		-31.3			195.9	-31.3
7.0	92.1	0.9	47.0		67.3	23.8	8.9	20.8		M35CGrt74Ar	89.9	0.0	6.8	0.9	2.4	0.0		7	90	1	2		67.0		230.3		40.8		-59.4			230.3	-59.4
6.2	88.2	5.6	49.7		27.9	46.8	25.4	48.8		ED63 Grt38c	79.9	0.0	5.6	5.1	9.4	0.0		6	80	5	9		69.7		220.5		68.8		-116.9			220.5	-116.9
32.9	64.9	2.2	34.6		73.5	21.6	4.9	15.7		ED50 Grt20c	59.2	0.0	30.0	2.0	8.8	0.0		30	59	2	9		54.6		162.3		35.7		-53.9			162.3	-53.9
34.4	63.3	2.3	34.0		66.6	29.0	4.5	18.9		ED50 Grt50/6r	55.1	0.0	29.9	2.0	13.0	0.0		30	55	2	13		54.0		158.3		38.9		-72.4			158.3	-72.4
10.8	88.8	0.4	44.8		45.9	52.2	1.9	28.0		M10Grt335r	79.1	0.0	9.6	0.4	10.9	0.0		10	79	0	11		64.8		221.9		48.0		-130.4			221.9	-130.4
5.1	62.9	32.1	63.5		12.6	7.9	79.5	83.5		C1Bc	60.8	0.0	4.9	31.0	3.1	0.2		5	61	31	3		83.5		157.2		103.5		-19.9			157.2	-19.9
4.1	67.7	28.1	62.0		11.5	10.4	78.1	83.3		C1Br	65.3	0.0	4.0	27.1	3.6	0.1		4	65	27	4		82.0		169.3		103.3		-25.9			169.3	-25.9
0.0	52.9	47.1	73.6		0.0	1.7	98.3	99.1		C1Ac	51.5	0.0	0.0	45.9	0.8	1.9			52	46	1		93.6		132.2		119.1		-4.3			132.2	-4.3
1.0	51.0	48.0	73.5		2.0	1.8	96.2	97.1		C1Ac	50.5	0.0	1.0	47.5	0.9	0.0		1	51	48	1		93.5		127.5		117.1		-4.6			127.5	-4.6
1.1	56.5	42.4	70.7		2.5	1.8	95.7	96.6		C1Ar	56.0	0.0	1.1	42.1	0.8	0.0		1	56	42	1		90.7		141.1		116.6		-4.5			141.1	-4.5
1.2	53.8	44.9	71.9		2.6	2.1	95.3	96.4		29.4.2	53.2	0.0	1.2	44.4	1.0	0.2		1	53	44	1		91.9		134.6		116.4		-5.4			134.6	-5.4
1.1	57.4	41.5	70.2		2.6	2.1	95.4	96.4		C1AJE	56.9	0.0	1.1	41.1	0.9	0.0		1	57	41	1		90.2		143.5		116.4		-5.2			143.5	-5.2
13.2	81.9	5.0	45.9		33.9	53.4	12.7	39.4		116-94c	67.8	0.0	10.9	4.1	17.2	0.0		11	68	4	17		65.9		204.7		59.4		-133.5			204.7	-133.5
15.0	80.1	4.9	44.9		41.2	45.4	13.4	36.1		116-94r	68.8	0.0	12.9	4.2	14.2	0.0		13	69	4	14		64.9		200.2		56.1		-113.4			200.2	-113.4
19.7	78.2	2.1	41.2		27.7	69.4	2.9	37.6		217-94c	52.3	0.0	13.2	1.4	33.1	0.0		13	52	1	33		61.2		195.4		57.6		-173.5			195.4	-173.5
16.6	77.2	6.3	44.8		56.7	21.8	21.5	32.4		217-94r	72.6	0.0	15.6	5.9	6.0	0.0		16	73	6	6		64.8		192.9		52.4		-54.5			192.9	-54.5
15.2	77.9	6.9	45.9		13.8	79.8	6.3	46.2		44-93c	41.5	0.0	8.1	3.7	46.7	0.0		8	42	4	47		65.9		194.7		66.2		-199.6			194.7	-199.6
11.4	79.9	8.7	48.6		20.4	64.0	15.6	47.6		44-93r	58.9	0.0	8.4	6.4	26.3	0.0		8	59	6	26		68.6		199.8		67.6		-160.0			199.8	-160.0
17.3	78.4	4.4	43.5		20.8	73.9	5.3	42.2		41a-85c	48.6	0.0	10.7	2.7	38.0	0.0		11	49	3	38		63.5		196.0		62.2		-184.8			196.0	-184.8
6.6	85.5	7.8	50.6		20.1	56.1	23.7	51.8		41a-85r	72.1	0.0	5.6	6.6	15.6	0.0		6	72	7	16		70.6		213.8		71.8		-140.3			213.8	-140.3
23.4	72.8	3.7	40.2		48.9	43.3	7.8	29.5		47-93c	60.3	0.0	19.4	3.1	17.2	0.0		19	60	3	17		60.2		182.1		49.5		-108.3			182.1	-108.3
3.4	89.0	7.6	52.1		14.4	53.1	32.5	59.1		47-93r	79.1	0.0	3.0	6.8	11.1	0.0		3	79	7	11		72.1		222.4		79.1		-132.8			222.4	-132.8
15.7	78.8	5.5	44.9		41.1	44.5	14.4	36.7		5-94c	67.4	0.0	13.4	4.7	14.5	0.0		13	67	5	15		64.9		197.1		56.7		-111.2			197.1	-111.2
11.1	80.5	8.4	48.6		47.6	16.4	36.0	44.2		5-94r	77.4	0.0	10.7	8.1	3.7	0.0		11	77	8	4		68.6		201.1		64.2		-41.1			201.1	-41.1
15.3	64.9	19.8	52.2		39.7	9.1	51.2	55.8		ZT1c	62.6	0.0	14.8	19.1	3.4	0.0		15	63	19	3		72.2		162.2		75.8		-22.8			162.2	-22.8
9.5	80.4	10.1	50.3		35.5	27.1	37.5	51.0		4988	74.9	0.0	8.9	9.4	6.8	0.0		9	75	9	7		70.3		200.9		71.0		-67.7			200.9	-67.7
3.5	82.5	13.9	55.2		14.4	28.8	56.8	71.2		OW4B	77.0	0.0	3.3	13.0	6.6	0.0		3	77	13	7		75.2		206.3		91.2		-72.1			206.3	-72.1
3.9	80.5	15.5	55.8		15.5	22.7	61.8	73.1		OW5A	76.2	0.0	3.7	14.7	5.4	0.0		4	76	15	5		75.8		201.4		93.1		-56.7			201.4	-56.7
4.1	78.5	17.4	56.7		10.8	42.9	46.3	67.7		GMPa5-1	67.5	0.0	3.5	15.0	13.9	0.0		4	68	15	14		76.7		196.2		87.7		-107.3			196.2	-107.3
2.0	91.5	6.5	52.2		7.6	67.9	24.6	58.5		WP30	77.6	0.0	1.7	5.5	15.2	0.0		2	78	6	15		72.2		228.8		78.5		-169.6			228.8	-169.6
7.9	66.5	25.6	58.9		22.1	5.7	72.1	75.0		SG7	65.2	0.0	7.7	25.1	2.0	0.0		8	65	25	2		78.9		166.3		95.0		-14.4			166.3	-14.4
12.9	50.8	36.4	61.8		25.5	2.6	71.9	73.2		SG9A	50.1	0.0	12.7	35.9	1.3	0.0		13	50	36	1		81.8		126.9		93.2		-6.5			126.9	-6.5
4.9	47.5	47.6	71.3		9.3	0.8	89.9	90.3		Py DHZ-21	47.3	2.5	2.4	47.4	0.4	0.0		5	47	47	0		91.3		118.7		110.3		-1.9			118.7	-1.9
12.3	43.4	44.4	66.0		21.2	2.4	76.4	77.6		Py DHZ-25	42.7	3.4	8.7	43.7	1.4	0.0		12	43	44	1		86.0		108.4		97.6		-6.1			108.4	-6.1
2.5	84.3	13.1	55.3		12.2	24.4	63.5	75.6		Al DHZ-5	80.3	0.0	2.4	12.5	4.8	0.0		2	80	13	5		75.3		210.9		95.6		-60.9			210.9	-60.9
5.9	80.2	13.8	54.0		25.0	16.7	58.3	66.7		Al DHZ-7	77.2	5.7	0.0	13.3	3.8	0.0		6	77	13	4		74.0		200.6		86.7		-41.7			200.6	-41.7
8.2	79.7	12.1	52.0		35.7	11.6	52.7	58.5		Al DHZ-8	77.6	0.0	8.0	11.8	2.6	0.0		8	78	12	3		72.0		199.2		78.5		-29.0			199.2	-29.0
1.7	87.6	10.7	54.5		6.4	54.0	39.6	66.6		Al DHZ-10	76.5	1.5	0.0	9.3	12.7	0.0		2	77	9	13		74.5		219.1		86.6		-135.1			219.1	-135.1
15.9	79.1	5.0	44.6		56.5	25.6	17.9	30.7		Al DHZ-15	73.7	6.7	8.1	4.7	6.7	0.0		15	74	5	7		64.6		197.7		50.7		-63.9			197.7	-63.9
9.7	86.4	3.9	47.1		30.1	57.7	12.1	41.0		Al DHZ-16	72.8	0.0	8.2	3.3	15.7	0.0		8	73	3	16		67.1		215.9		61.0		-144.3			215.9	-144.3
2.3	73.4	24.3	61.0		7.7	8.8	83.5	87.9		Al DHZ-18	71.6	0.3	1.9	23.7	2.5	0.0		2	72	24	3		81.0		183.6		107.9		-22.0			183.6	-22.0
26.8	69.5	3.7	38.4		80.8	8.0	11.1	15.2		Al DHZ-21	67.6	0.0	26.1	3.6	2.6	0.0		26	68	4	3		58.4		173.7		35.2		-20.1			173.7	-20.1
30.0	68.3	1.6	35.8		86.9	8.3	4.8	8.9		Al DHZ-22	66.4	0.0	29.2	1.6	2.8	0.0		29	66	2	3		55.8		170.8		28.9		-20.8			170.8	-20.8
2.4	66.8	30.8	64.2		7.1	2.4	90.5	91.7		Al DHZ-23	66.2	0.5	1.9	30.5	0.8	0.1		2	66	31	1		84.2		167.0		111.7		-5.9			167.0	-5.9
5.3	68.3	26.4	60.6		15.0	10.3	74.8	79.9		Al DHZ-24	66.0	0.0	5.1	25.5	3.5	0.0		5	66	26	4		80.6		170.8		99.9		-25.7			170.8	-25.7
2.8	62.5	34.7	65.9		7.4	2.1	90.5	91.5		Al DHZ-27	61.7	2.0	0.8	34.2	0.8	0.5		3	62	34	1		85.9		156.3		111.5		-5.3			156.3	-5.3
45.3	42.8	12.0	33.3		50.3	36.4	13.3	31.5		Al DHZ-48	32.2	8.2	25.9	9.0	24.7	0.0		34	32	9	25		53.3		106.9		51.5		-91.1			106.9	-91.1
50.8	46.9	2.2	25.7		79.1	17.5	3.5	12.2		Gr DHZ-21	42.2	2.2	43.5	2.0	10.1	0.0		46	42	2	10		45.7		117.4		32.2		-43.7			117.4	-43.7
5.5	75.5	18.9	56.7		19.1	15.5	65.3	73.1		LC_18 Ar01-c	72.3	5.3	0.0	18.1	4.3	0.0		5	72	18	4		76.7		188.9		93.1		-38.8			188.9	-38.8
5.3	79.2	15.5	55.1		19.8	22.5	57.7	69.0		LC_19 Ar01 -r	74.6	1.6	3.4	14.6	5.7	0.0		5	75	15	6		75.1		198.0		89.0		-56.3			198.0	-56.3
4.9	76.4	18.8	56.9		16.4	20.6	63.0	73.3		LC_20 Ar9936	72.0	4.6	0.0	17.7	5.8	0.0		5	72	18	6		76.9		190.9		93.3		-51.6			190.9	-51.6
5.9	80.4	13.8	54.0		24.3	18.3	57.4	66.5		LC_21 Si9414	76.9	0.0	5.6	13.2	4.2	0.0		6	77	13	4		74.0		200.9		86.5		-45.7			200.9	-45.7
4.5	77.2	18.3	56.9		18.1	8.2	73.7	77.8		LC_22 Bi9801-c	75.7	1.4	3.0	17.9	2.0	0.0		4	76	18	2		76.9		193.1		97.8		-20.6			193.1	-20.6
2.6	85.1	12.2	54.8		12.9	27.3	59.8	73.5		LC_23 Bi9801-r	80.6	0.0	2.5	11.6	5.3	0.0		3	81	12	5		74.8		212.8		93.5		-68.3			212.8	-68.3
20.6	72.4	7.0	43.2		65.1	12.8	22.0	28.5		LC_24 Tr9902-c	69.6	0.0	19.8	6.7	3.9	0.0		20	70	7	4		63.2		181.1		48.5		-32.1			181.1	-32.1
3.8	86.7	9.6	52.9		18.0	36.1	45.9	63.9		LC_25 Tr9904-r	80.5	0.0	3.5	8.9	7.0	0.0		4	81	9	7		72.9		216.6		83.9		-90.2			216.6	-90.2
26.7	67.3	6.0	39.7		59.7	26.8	13.5	26.9		B10c	60.1	0.0	23.8	5.4	10.7	0.0		24	60	5	11		59.7		168.3		46.9		-67.1			168.3	-67.1
20.9	70.5	8.7	43.9		63.8	9.6	26.6	31.4		B10r	68.3	0.0	20.2	8.4	3.0	0.0		20	68	8	3		63.9		176.2		51.4		-24.0			176.2	-24.0
15.9	73.6	10.5	47.3		46.1	23.6	30.3	42.1		V15c	68.1	0.0	14.7	9.7	7.5	0.0		15	68	10	8		67.3		184.1		62.1		-59.0			184.1	-59.0
10.4	78.0	11.6	50.6		38.9	17.9	43.3	52.2		V15r	74.4	0.0	9.9	11.1	4.6	0.0		10	74	11	5		70.6		195.0		72.2		-44.7			195.0	-44.7
22.1	72.4	5.5	41.7		51.7	35.5	12.8	30.6		HNU2c	62.8	0.0	19.2	4.8	13.2	0.0		19	63	5	13		61.7		180.9		50.6		-88.7			180.9	-88.7
17.6	74.6	7.8	45.1		56.7	18.0	25.3	34.3		HNU2r	70.6	0.0	16.7	7.4	5.3	0.0		17	71	7	5		65.1		186.4		54.3		-45.1			186.4	-45.1
13.0	75.7	11.3	49.2		44.0	17.5	38.5	47.2		SY27c	72.0	0.0	12.3	10.8	4.9	0.0		12	72	11	5		69.2		189.3		67.2		-43.7			189.3	-43.7
10.1	77.7	12.3	51.1		39.0	13.4	47.6	54.3		SY27r	75.1	0.0	9.7	11.9	3.3	0.0		10	75	12	3		71.1		194.1		74.3		-33.5			194.1	-33.5
20.7	69.4	9.9	44.6		56.8	15.8	27.3	35.3		SY8c	65.6	0.0	19.5	9.4	5.5	0.0		20	66	9	5		64.6		173.5		55.3		-39.6			173.5	-39.6
10.1	72.7	17.1	53.5		36.4	2.1	61.4	62.5		SY8r	72.3	0.0	10.1	17.0	0.6	0.0		10	72	17	1		73.5		181.8		82.5		-5.3			181.8	-5.3
18.1	72.1	9.8	45.8		59.2	8.8	32.0	36.4		VV5ac	70.2	0.0	17.7	9.5	2.6	0.0		18	70	10	3		65.8		180.2		56.4		-22.0			180.2	-22.0
13.4	72.8	13.8	50.2		48.2	2.2	49.6	50.7		VV5a	72.4	0.0	13.3	13.7	0.6	0.0		13	72	14	1		70.2		182.0		70.7		-5.4			182.0	-5.4
2.6	86.5	10.8	54.1		16.7	14.2	69.1	76.2		4M127-1	84.5	0.7	1.9	10.6	2.2	0.1		3	85	11	2		74.1		216.3		96.2		-35.5			216.3	-35.5
3.8	88.2	8.0	52.1		17.0	47.1	35.9	59.4		4M165-2	79.8	0.7	2.8	7.3	9.5	0.0		3	80	7	10		72.1		220.4		79.4		-117.8			220.4	-117.8
21.0	70.0	9.0	44.0		39.3	43.9	16.8	38.8		136 1-g1c	56.6	0.0	17.0	7.3	19.0	0.2		17	57	7	19		64.0		175.1		58.8		-109.7			175.1	-109.7
22.7	68.7	8.6	42.9		42.3	41.8	16.0	36.9		136 1-g1r	56.0	0.0	18.5	7.0	18.3	0.2		19	56	7	18		62.9		171.7		56.9		-104.5			171.7	-104.5
16.6	75.3	8.1	45.8		49.9	25.8	24.4	37.3		253b 4-g1r	69.2	0.0	15.3	7.5	7.9	0.2		15	69	7	8		65.8		188.2		57.3		-64.5			188.2	-64.5
22.5	66.2	11.3	44.4		45.2	32.1	22.7	38.8		441 2-g4r	57.1	0.0	19.4	9.7	13.8	0.0		19	57	10	14		64.4		165.6		58.8		-80.4			165.6	-80.4
16.0	79.8	4.2	44.1		41.5	47.5	11.0	34.7		GRT28Z1	67.5	0.0	13.5	3.6	15.5	0.0		14	67	4	15		64.1		199.5		54.7		-118.8			199.5	-118.8
10.8	79.3	9.9	49.6		49.2	5.4	45.3	48.1		GRT6Z2	78.3	0.0	10.7	9.8	1.2	0.0		11	78	10	1		69.6		198.1		68.1		-13.6			198.1	-13.6
27.3	64.5	8.2	40.5		60.2	21.6	18.2	29.0		MPA1	58.8	11.9	12.9	7.5	8.9	0.0		25	59	8	9		60.5		161.3		49.0		-54.0			161.3	-54.0
27.7	68.1	4.2	38.2		64.9	25.4	9.7	22.4		MPA2	61.4	12.4	12.7	3.8	9.8	0.0		25	61	4	10		58.2		170.2		42.4		-63.5			170.2	-63.5
15.0	76.9	8.0	46.5		58.4	10.2	31.3	36.4		MPA4	75.0	7.0	7.7	7.8	2.6	0.0		15	75	8	3		66.5		192.3		56.4		-25.6			192.3	-25.6
15.2	75.3	9.4	47.1		56.9	7.9	35.2	39.1		MPA5	73.8	3.5	11.4	9.2	2.1	0.0		15	74	9	2		67.1		188.3		59.1		-19.7			188.3	-19.7
18.0	70.2	11.8	46.9		58.4	3.4	38.2	39.9		MPA6	69.5	6.4	11.4	11.7	1.1	0.0		18	69	12	1		66.9		175.5		59.9		-8.6			175.5	-8.6
11.2	79.5	9.3	49.1		51.2	6.3	42.5	45.7		MPA7	78.4	8.2	2.9	9.2	1.4	0.0		11	78	9	1		69.1		198.7		65.7		-15.7			198.7	-15.7
13.3	73.0	13.7	50.2		47.2	4.3	48.5	50.7		MPA8	72.1	7.6	5.5	13.6	1.2	0.0		13	72	14	1		70.2		182.4		70.7		-10.8			182.4	-10.8
15.1	73.5	11.4	48.1		55.5	2.7	41.8	43.2		MPA9	72.9	7.9	7.1	11.3	0.7	0.0		15	73	11	1		68.1		183.7		63.2		-6.8			183.7	-6.8
5.9	81.6	12.6	53.4		29.9	5.9	64.2	67.1		MPA10	80.6	3.0	2.8	12.4	1.1	0.0		6	81	12	1		73.4		203.9		87.1		-14.7			203.9	-14.7
19.4	69.1	11.5	46.0		60.0	4.4	35.6	37.8		MPA11	68.1	9.9	9.2	11.3	1.4	0.0		19	68	11	1		66.0		172.8		57.8		-11.0			172.8	-11.0
21.1	67.8	11.1	45.0		56.0	14.6	29.4	36.7		MPA12	64.3	6.7	13.3	10.5	5.2	0.0		20	64	10	5		65.0		169.5		56.7		-36.5			169.5	-36.5
26.3	60.0	13.8	43.7		63.7	2.9	33.4	34.8		MPA13	59.3	9.8	16.2	13.6	1.2	0.0		26	59	14	1		63.7		149.9		54.8		-7.4			149.9	-7.4
2.7	82.0	15.3	56.3		13.7	9.7	76.6	81.4		BY110	80.4	0.0	2.7	15.0	1.9	0.0		3	80	15	2		76.3		204.9		101.4		-24.2			204.9	-24.2
3.3	79.9	16.8	56.7		12.5	24.4	63.1	75.3		BY326	75.0	0.0	3.1	15.8	6.1	0.0		3	75	16	6		76.7		199.6		95.3		-60.9			199.6	-60.9
18.7	77.1	4.3	42.8		78.7	3.4	17.9	19.6		80904	76.4	0.0	18.5	4.2	0.8	0.0		19	76	4	1		62.8		192.7		39.6		-8.6			192.7	-8.6
27.8	69.8	2.4	37.3		63.3	31.3	5.4	21.0		80904	61.4	0.0	24.4	2.1	12.1	0.0		24	61	2	12		57.3		174.6		41.0		-78.1			174.6	-78.1
25.0	70.5	4.5	39.8		80.5	4.8	14.6	17.0		JG111m	69.5	0.0	24.6	4.5	1.5	0.0		25	69	4	1		59.8		176.3		37.0		-12.0			176.3	-12.0
23.3	71.9	4.8	40.7		73.5	11.5	15.0	20.8		JG111i	69.4	0.0	22.5	4.6	3.5	0.0		23	69	5	4		60.7		179.7		40.8		-28.6			179.7	-28.6
18.3	74.3	7.4	44.6		67.1	5.7	27.2	30.1		JG113m	73.2	0.0	18.0	7.3	1.5	0.0		18	73	7	2		64.6		185.8		50.1		-14.3			185.8	-14.3
19.3	73.1	7.6	44.1		68.5	4.6	27.0	29.2		JG113i	72.2	0.0	19.1	7.5	1.3	0.0		19	72	8	1		64.1		182.7		49.2		-11.4			182.7	-11.4
26.3	70.2	3.5	38.6		80.0	9.5	10.5	15.3		JG119m	68.1	0.0	25.5	3.4	3.0	0.0		26	68	3	3		58.6		175.6		35.3		-23.7			175.6	-23.7
26.6	69.0	4.3	38.8		74.8	13.1	12.1	18.7		JG119i	66.0	0.0	25.5	4.1	4.5	0.0		25	66	4	4		58.8		172.6		38.7		-32.7			172.6	-32.7
19.7	55.1	25.2	52.7		43.5	1.1	55.4	56.0	Granulite	75_Pelite	54.8	0.0	19.6	25.0	0.5	0.0		20	55	25	1		72.7		137.8		76.0		-2.8			137.8	-2.8
12.3	63.2	24.5	56.1		32.6	2.4	65.0	66.2	GREEN	76_Pelite	62.6	0.0	12.2	24.3	0.9	0.0		12	63	24	1		76.1		157.9		86.2		-6.0			157.9	-6.0
22.3	49.8	27.8	52.8		42.9	3.5	53.5	55.3		115_Pelite	48.9	1.7	20.2	27.3	1.8	0.0		22	49	27	2		72.8		124.6		75.3		-8.8			124.6	-8.8
11.3	77.3	11.3	50.0		42.6	14.8	42.6	50.0		DX-258r	74.3	0.0	10.9	10.9	3.8	0.0		11	74	11	4		70.0		193.3		70.0		-37.1			193.3	-37.1
11.5	75.8	12.7	50.6		40.3	15.0	44.7	52.2		DX-258c	72.7	0.0	11.0	12.2	4.1	0.0		11	73	12	4		70.6		189.5		72.2		-37.5			189.5	-37.5
6.0	68.0	26.0	60.0		17.1	8.6	74.3	78.6		DX-700r	66.0	0.0	5.8	25.2	2.9	0.0		6	66	25	3		80.0		170.1		98.6		-21.4			170.1	-21.4
5.9	59.3	34.8	64.4		13.7	6.1	80.1	83.2		DX-700c	57.8	0.0	5.8	33.9	2.6	0.0		6	58	34	3		84.4		148.2		103.2		-15.4			148.2	-15.4
10.7	80.0	9.3	49.3		46.6	13.0	40.4	46.9		PK194(1)r	77.8	0.0	10.4	9.0	2.9	0.0		10	78	9	3		69.3		200.1		66.9		-32.5			200.1	-32.5
9.9	76.9	13.1	51.6		39.0	9.6	51.4	56.2		PK194(1)c	75.0	0.0	9.7	12.8	2.4	0.0		10	75	13	2		71.6		192.3		76.2		-24.1			192.3	-24.1
12.4	48.6	39.0	63.3		23.6	1.9	74.4	75.4		94M43c	47.9	0.0	12.2	38.4	1.0	0.4		12	48	38	1		83.3		121.6		95.4		-4.8			121.6	-4.8
3.1	63.6	33.3	65.1		7.9	6.9	85.2	88.6		94M43r	61.5	0.0	3.0	32.2	2.6	0.7		3	62	32	3		85.1		159.0		108.6		-17.2			159.0	-17.2
4.9	44.5	50.6	72.9		8.5	2.8	88.6	90.0		447_Pelite	43.8	0.0	4.8	49.8	1.6	0.0		5	44	50	2		92.9		111.3		110.0		-7.1			111.3	-7.1
15.0	47.0	38.0	61.5		27.4	3.0	69.6	71.1		460_Pelite	46.2	0.0	14.7	37.4	1.6	0.0		15	46	37	2		81.5		117.5		91.1		-7.4			117.5	-7.4
16.1	47.2	36.7	60.3		29.5	3.2	67.4	68.9		461_Pelite	46.4	1.4	14.4	36.1	1.7	0.0		16	46	36	2		80.3		118.0		88.9		-7.9			118.0	-7.9
20.7	28.2	51.1	65.2		28.7	0.7	70.7	71.0		462_Pelite	28.1	0.0	20.6	50.8	0.5	0.0		21	28	51	1		85.2		70.6		91.0		-1.7			70.6	-1.7
5.5	62.9	31.6	63.0		14.8	0.3	84.9	85.0		733_Pelite	62.7	0.0	5.5	31.5	0.1	0.2		6	63	32	0		83.0		157.2		105.0		-0.7			157.2	-0.7
3.1	72.1	24.9	60.9		10.2	7.5	82.4	86.1		734_Pelite	70.4	0.0	3.0	24.3	2.2	0.1		3	70	24	2		80.9		180.1		106.1		-18.6			180.1	-18.6
18.5	0.3	81.2	81.3		17.7	4.8	77.5	79.9		735_Pelite	0.3	0.0	17.6	77.2	4.8	0.0		18	0	77	5		101.3		0.8		99.9		-12.0			0.8	-12.0
4.6	63.6	31.8	63.6		11.8	6.3	81.8	85.0		736_Pelite	62.1	0.0	4.5	31.1	2.4	0.0		5	62	31	2		83.6		158.9		105.0		-15.8			158.9	-15.8
6.3	67.2	26.5	60.1		17.6	8.6	73.8	78.1		737_Pelite	65.0	0.0	6.1	25.6	3.0	0.2		6	65	26	3		80.1		168.0		98.1		-21.6			168.0	-21.6
1.7	73.3	25.1	61.7		5.4	13.2	81.4	88.0		738_Pelite	70.4	0.0	1.6	24.1	3.9	0.0		2	70	24	4		81.7		183.1		108.0		-32.9			183.1	-32.9
18.8	69.3	11.9	46.5		54.7	10.9	34.4	39.9		S690Dc	66.7	0.0	18.1	11.4	3.6	0.1		18	67	11	4		66.5		173.3		59.9		-27.2			173.3	-27.2
19.2	70.0	10.8	45.8		57.6	10.2	32.2	37.3		S690Dr	67.7	0.0	18.6	10.4	3.3	0.0		19	68	10	3		65.8		175.0		57.3		-25.5			175.0	-25.5
20.9	64.3	14.8	46.9		54.7	6.7	38.6	42.0		S789c	62.6	0.0	20.4	14.4	2.5	0.1		20	63	14	3		66.9		160.7		62.0		-16.8			160.7	-16.8
22.2	65.5	12.4	45.1		59.1	8.0	33.0	37.0		S789r	63.5	0.0	21.5	12.0	2.9	0.1		22	64	12	3		65.1		163.7		57.0		-19.9			163.7	-19.9
20.6	64.7	14.7	47.1		54.2	7.0	38.8	42.3		S825c	63.0	0.0	20.0	14.3	2.6	0.0		20	63	14	3		67.1		161.9		62.3		-17.6			161.9	-17.6
21.4	62.0	16.6	47.6		52.8	6.3	40.9	44.1		S825r	60.5	1.6	19.3	16.2	2.5	0.0		21	61	16	3		67.6		155.0		64.1		-15.8			155.0	-15.8
8.5	71.4	20.1	55.8		27.4	7.9	64.7	68.6		S800Bc	69.7	0.0	8.3	19.6	2.4	0.0		8	70	20	2		75.8		178.5		88.6		-19.8			178.5	-19.8
17.5	68.9	13.6	48.0		51.7	8.2	40.1	44.2		S800Br	66.8	0.0	17.0	13.2	2.7	0.3		17	67	13	3		68.0		172.2		64.2		-20.5			172.2	-20.5
18.4	58.8	22.9	52.2		42.7	4.3	53.1	55.2		S663c	57.6	0.0	18.0	22.4	1.8	0.2		18	58	22	2		72.2		146.9		75.2		-10.7			146.9	-10.7
20.4	59.8	19.9	49.7		47.8	5.5	46.6	49.4		S663r	58.4	0.0	19.9	19.4	2.3	0.1		20	58	19	2		69.7		149.4		69.4		-13.8			149.4	-13.8
3.1	54.4	42.5	69.7		6.7	2.8	90.5	91.9		S703c	53.7	1.4	1.7	42.0	1.3	0.0		3	54	42	1		89.7		135.9		111.9		-7.0			135.9	-7.0
3.4	58.2	38.3	67.4		8.0	2.8	89.2	90.6		S703r	57.6	0.0	3.4	37.9	1.2	0.0		3	58	38	1		87.4		145.6		110.6		-7.1			145.6	-7.1
4.8	47.2	47.9	71.6		9.1	0.9	90.0	90.5		782_Pelite	47.0	0.0	4.8	47.7	0.5	0.0		5	47	48	1		91.6		118.1		110.5		-2.4			118.1	-2.4
4.8	43.8	51.4	73.3		8.5	0.9	90.6	91.0		783_Pelite	43.6	0.0	4.8	51.1	0.5	0.0		5	44	51	1		93.3		109.5		111.0		-2.2			109.5	-2.2
6.7	63.0	30.2	61.7		18.0	1.6	80.4	81.2		784_Pelite	62.6	0.0	6.7	30.0	0.6	0.0		7	63	30	1		81.7		157.6		101.2		-4.0			157.6	-4.0
12.6	55.9	31.4	59.4		28.0	2.2	69.7	70.9		785_Pelite	55.3	0.0	12.5	31.1	1.0	0.1		13	55	31	1		79.4		139.8		90.9		-5.6			139.8	-5.6
12.3	50.9	36.8	62.2		24.5	2.2	73.2	74.3		786_Pelite	50.4	0.0	12.2	36.4	1.1	0.0		12	50	36	1		82.2		127.3		94.3		-5.5			127.3	-5.5
4.3	54.6	41.1	68.4		9.1	2.8	88.1	89.5		787_Pelite	53.9	0.0	4.2	40.6	1.3	0.0		4	54	41	1		88.4		136.5		109.5		-7.0			136.5	-7.0
4.2	57.3	38.4	67.1		9.7	1.9	88.4	89.3		788_Pelite	56.8	0.0	4.2	38.1	0.8	0.0		4	57	38	1		87.1		143.3		109.3		-4.6			143.3	-4.6
3.5	54.5	42.0	69.3		7.4	3.5	89.2	90.9		843_Pelite	53.5	1.9	1.5	41.2	1.6	0.2		3	54	41	2		89.3		136.3		110.9		-8.7			136.3	-8.7
3.2	54.5	42.3	69.6		6.7	3.7	89.6	91.5		844_Pelite	53.4	0.0	3.1	41.5	1.7	0.3		3	53	42	2		89.6		136.2		111.5		-9.2			136.2	-9.2
28.2	56.5	15.3	43.5		56.8	12.4	30.8	37.0		921_Pelite	53.2	0.0	26.6	14.4	5.8	0.0		27	53	14	6		63.5		141.2		57.0		-31.0			141.2	-31.0
23.7	55.1	21.2	48.7		50.3	4.8	44.9	47.3		922_Pelite	53.9	0.0	23.2	20.7	2.2	0.0		23	54	21	2		68.7		137.8		67.3		-11.9			137.8	-11.9
23.8	55.1	21.1	48.6		51.0	3.9	45.1	47.1		923_Pelite	54.1	0.0	23.4	20.7	1.8	0.0		23	54	21	2		68.6		137.7		67.1		-9.8			137.7	-9.8
23.5	55.0	21.5	49.0		50.4	3.3	46.3	47.9		924_Pelite	54.2	0.0	23.1	21.2	1.5	0.0		23	54	21	2		69.0		137.6		67.9		-8.2			137.6	-8.2
21.4	58.9	19.7	49.2		50.4	3.1	46.5	48.1		925_Pelite	58.2	0.0	21.1	19.5	1.3	0.0		21	58	20	1		69.2		147.3		68.1		-7.8			147.3	-7.8
22.0	58.8	19.2	48.6		52.2	2.4	45.5	46.7		926_Pelite	58.2	0.0	21.8	19.0	1.0	0.0		22	58	19	1		68.6		147.0		66.7		-6.0			147.0	-6.0
23.9	53.1	23.1	49.6		49.8	2.1	48.1	49.2		927_Pelite	52.5	0.0	23.6	22.8	1.0	0.0		24	53	23	1		69.6		132.7		69.2		-5.3			132.7	-5.3
27.8	55.8	16.4	44.3		54.8	12.8	32.4	38.8		928_Pelite	52.4	0.0	26.1	15.4	6.1	0.0		26	52	15	6		64.3		139.5		58.8		-32.0			139.5	-32.0
24.3	56.0	19.7	47.7		52.0	5.7	42.3	45.2		929_Pelite	54.5	0.0	23.6	19.2	2.6	0.0		24	55	19	3		67.7		140.0		65.2		-14.3			140.0	-14.3
22.9	47.0	30.1	53.6		42.2	2.6	55.2	56.5		Al DHZ-43	46.3	0.0	22.6	29.6	1.4	0.0		23	46	30	1		73.6		117.5		76.5		-6.5			117.5	-6.5
11.6	62.7	25.7	57.0		30.2	2.8	66.9	68.3		GR02-8c-2-8b	62.0	0.0	11.5	25.4	1.1	0.0		11	62	25	1		77.0		156.7		88.3		-7.1			156.7	-7.1
2.7	66.1	31.2	64.3		7.7	3.8	88.5	90.4		GR02-8c-15-8b	65.1	0.0	2.7	30.8	1.3	0.1		3	65	31	1		84.3		165.1		110.4		-9.4			165.1	-9.4
10.8	76.4	12.8	51.0		40.5	11.4	48.0	53.8		Li-5 71	74.0	0.0	10.5	12.4	3.0	0.1		10	74	12	3		71.0		191.0		73.8		-28.6			191.0	-28.6
9.7	78.5	11.8	51.1		38.9	13.4	47.7	54.4		Li-5 68	75.8	0.0	9.3	11.5	3.2	0.2		9	76	11	3		71.1		196.2		74.4		-33.4			196.2	-33.4
3.5	79.0	17.5	57.0		14.7	13.1	72.3	78.8		Li-6 82	76.6	0.0	3.4	16.9	3.1	0.0		3	77	17	3		77.0		197.5		98.8		-32.7			197.5	-32.7
3.0	79.0	18.0	57.5		12.3	13.3	74.4	81.0		Li-6 85	76.6	0.0	2.9	17.4	3.1	0.0		3	77	17	3		77.5		197.6		101.0		-33.3			197.6	-33.3
9.7	69.7	20.6	55.5		29.1	9.1	61.8	66.4		253b 4-g1c	67.3	0.0	9.4	19.9	2.9	0.5		9	67	20	3		75.5		174.2		86.4		-22.7			174.2	-22.7
8.6	72.4	19.0	55.2		27.7	10.9	61.4	66.9		253b 4-g1m	69.6	0.0	8.3	18.3	3.3	0.6		8	70	18	3		75.2		181.0		86.9		-27.3			181.0	-27.3
10.7	59.9	29.4	59.4		24.7	7.2	68.1	71.7		388c 1-g1c	57.2	0.0	10.2	28.0	3.0	1.7		10	57	28	3		79.4		149.8		91.7		-18.1			149.8	-18.1
8.7	60.9	30.4	60.9		20.7	7.2	72.1	75.7		388c 1-g1m	58.0	0.0	8.3	29.0	2.9	1.8		8	58	29	3		80.9		152.1		95.7		-18.0			152.1	-18.0
8.7	69.6	21.6	56.4		25.3	12.1	62.6	68.7		388c 1-g1r	65.4	0.0	8.2	20.3	3.9	2.2		8	65	20	4		76.4		174.1		88.7		-30.1			174.1	-30.1
16.0	67.6	16.4	50.2		36.7	25.5	37.7	50.5		441 4-g16c	60.8	0.0	14.4	14.8	10.0	0.2		14	61	15	10		70.2		169.0		70.5		-63.8			169.0	-63.8
5.3	60.3	34.4	64.6		13.0	1.9	85.0	86.0		1	59.8	0.0	5.2	34.2	0.8	0.0		5	60	34	1		84.6		150.7		106.0		-4.8			150.7	-4.8
2.6	59.2	38.2	67.8		6.2	2.1	91.7	92.8		3	58.7	0.0	2.6	37.9	0.9	0.0		3	59	38	1		87.8		148.0		112.8		-5.1			148.0	-5.1
3.5	60.6	35.9	66.2		8.7	2.4	88.9	90.1		9	60.0	0.0	3.5	35.6	1.0	0.0		3	60	36	1		86.2		151.4		110.1		-6.1			151.4	-6.1
11.9	60.5	27.7	57.9		29.7	1.2	69.1	69.7		2	60.2	0.0	11.8	27.5	0.5	0.0		12	60	28	0		77.9		151.1		89.7		-2.9			151.1	-2.9
2.7	61.0	36.4	66.9		6.7	2.5	90.8	92.1		5	60.4	0.0	2.6	36.0	1.0	0.0		3	60	36	1		86.9		152.4		112.1		-6.3			152.4	-6.3
6.2	60.5	33.4	63.6		15.3	2.1	82.6	83.6		7	60.0	0.0	6.1	33.1	0.9	0.0		6	60	33	1		83.6		151.2		103.6		-5.4			151.2	-5.4
7.2	63.6	29.2	61.0		19.3	2.1	78.6	79.7		(1)-C	63.1	0.0	7.1	29.0	0.8	0.0		7	63	29	1		81.0		159.0		99.7		-5.3			159.0	-5.3
6.5	49.4	44.1	68.8		12.8	0.2	87.1	87.1		4.5	49.2	0.0	6.5	44.0	0.1	0.3		6	49	44	0		88.8		123.5		107.1		-0.4			123.5	-0.4
7.6	52.5	39.9	66.2		15.9	0.4	83.7	83.9		2.3	52.4	0.0	7.6	39.8	0.2	0.0		8	52	40	0		86.2		131.3		103.9		-1.0			131.3	-1.0
